# Supplementary material for: Non-canonical function of an Hif-1α splice variant contributes to the sustained flight of locusts
Source: eLife. 2022 Aug 30;11:e74554. doi: 10.7554/eLife.74554 (PMC9427102; doi:10.7554/eLife.74554)
Supplement: Figure 1—source data 1. [file elife-74554-fig1-data1.xlsx]

## Sheet: Sheet1
Figure 1G																Figure 1F
Hif-1α1							Hif-1α2									Hif-1α1								Hif-1α2
Flight muscle	Fat body	Midgut	Testis	Brain			Flight muscle	Fat body	Midgut	Testis	Brain					4th	5th	1st	6th	12th				4th	5th	1st	6th	12th
14.2786	33.9605	63.3725	51.4744	56.3282			39.2817	10.9722	8.08801	6.47906	12.0903					10.9576	8.77778	6.79209	7.6415	11.0338				2.57372	12.6745	22.5313	27.7392	48.6328
32.1286	63.3725	69.8304	29.3601	32.352			41.8102	9.03663	11.6785	5.71908	15.3034					10.8067	6.88691	10.2949	10.3665	8.59714				3.08198	11.908	32.9877	26.2429	32.7598
30.3955	62.9347	46.0709	41.8102	52.556			44.8111	8.20091	11.0485	9.09948	15.625					10.8819	7.80207	4.63914	7.08052	11.908				3.28036	17.0755	23.816	40.3321	36.0982
																8.0772	5.18325	8.53775	7.966	10.4386				5.67199	8.42021	24.4855	32.7598	35.6013
Bonferroni's Multiple Comparison Test	Mean Diff.	t	Significant? P < 0.05?	Summary	95% CI of diff		Bonferroni's Multiple Comparison Test	Mean Diff.	t	Significant? P < 0.05?	Summary	95% CI of diff
Column A vs Column B	-27.82	2.659	No	ns	-65.29 to 9.651		Column A vs Column B	32.56	19.78	Yes	***	26.67 to 38.46				Bonferroni's Multiple Comparison Test	Mean Diff.	t	Significant? P < 0.05?	Summary	95% CI of diff			Bonferroni's Multiple Comparison Test	Mean Diff.	t	Significant? P < 0.05?	Summary	95% CI of diff
Column A vs Column C	-34.16	3.265	No	ns	-71.63 to 3.315		Column A vs Column C	31.7	19.25	Yes	***	25.80 to 37.59				Column A vs Column B	3.018	2.531	No	ns	-0.9006 to 6.937			Column A vs Column B	-8.868	2.484	No	ns	-20.60 to 2.862
Column A vs Column D	-15.28	1.46	No	ns	-52.75 to 22.19		Column A vs Column D	34.87	21.18	Yes	***	28.97 to 40.76				Column A vs Column C	2.615	2.193	No	ns	-1.304 to 6.534			Column A vs Column C	-22.3	6.248	Yes	***	-34.03 to -10.57
Column A vs Column E	-21.48	2.053	No	ns	-58.95 to 15.99		Column A vs Column E	27.63	16.78	Yes	***	21.73 to 33.52				Column A vs Column D	1.917	1.608	No	ns	-2.002 to 5.836			Column A vs Column D	-28.12	7.877	Yes	***	-39.85 to -16.39
Column B vs Column C	-6.335	0.6055	No	ns	-43.81 to 31.14		Column B vs Column C	-0.8684	0.5275	No	ns	-6.764 to 5.027				Column A vs Column E	-0.3135	0.2629	No	ns	-4.232 to 3.605			Column A vs Column E	-34.62	9.699	Yes	***	-46.35 to -22.89
Column B vs Column D	12.54	1.199	No	ns	-24.93 to 50.01		Column B vs Column D	2.304	1.4	No	ns	-3.592 to 8.200				Column B vs Column C	-0.4035	0.3383	No	ns	-4.322 to 3.515			Column B vs Column C	-13.44	3.764	Yes	*	-25.17 to -1.706
Column B vs Column E	6.344	0.6063	No	ns	-31.13 to 43.82		Column B vs Column E	-4.936	2.999	No	ns	-10.83 to 0.9592				Column B vs Column D	-1.101	0.9233	No	ns	-5.020 to 2.818			Column B vs Column D	-19.25	5.393	Yes	***	-30.98 to -7.519
Column C vs Column D	18.88	1.804	No	ns	-18.60 to 56.35		Column C vs Column D	3.172	1.927	No	ns	-2.723 to 9.068				Column B vs Column E	-3.332	2.794	No	ns	-7.251 to 0.5871			Column B vs Column E	-25.75	7.215	Yes	***	-37.48 to -14.02
Column C vs Column E	12.68	1.212	No	ns	-24.79 to 50.15		Column C vs Column E	-4.068	2.471	No	ns	-9.963 to 1.828				Column C vs Column D	-0.6977	0.585	No	ns	-4.617 to 3.221			Column C vs Column D	-5.813	1.629	No	ns	-17.54 to 5.916
Column D vs Column E	-6.197	0.5923	No	ns	-43.67 to 31.28		Column D vs Column E	-7.24	4.398	Yes	*	-13.14 to -1.345				Column C vs Column E	-2.928	2.455	No	ns	-6.847 to 0.9905			Column C vs Column E	-12.32	3.451	Yes	*	-24.05 to -0.5882
																Column D vs Column E	-2.231	1.87	No	ns	-6.150 to 1.688			Column D vs Column E	-6.504	1.822	No	ns	-18.23 to 5.225
