# Supplementary material for: Non-canonical function of an Hif-1α splice variant contributes to the sustained flight of locusts
Source: eLife. 2022 Aug 30;11:e74554. doi: 10.7554/eLife.74554 (PMC9427102; doi:10.7554/eLife.74554)
Supplement: Figure 2—figure supplement 1—source data 1. [file elife-74554-fig2-figsupp1-data1.xlsx]

## Sheet: Sheet1
Figure 2-figure supplement 1A
PDK expression level						BNIP3 expression level					Figure 2-figure supplement 1B															Figure 2-figure supplement 1D
dsGFP	dsHif-1α1	dsHif-1α2				dsGFP	dsHif-1α1	dsHif-1α2			PDK expression level							BNIP3 expression level								BNIP3 expression level							PDK expression level
7.6211	4.22807	5.9794				60.9688	47.8352	22.6274			normoxia	hypoxia	hypoxia	hypoxia				normoxia	hypoxia	hypoxia	hypoxia					dsGFP	dsPHD	dsPHD+dsHif-1α1	dsPHD+dsHif-1α2				dsGFP	dsPHD	dsPHD+dsHif-1α1	dsPHD+dsHif-1α2
3.63008	7.4127	2.86791				29.0406	22.9433	36.0019			dsGFP	dsGFP	dsHif-1α1	dsHif-1α2				dsGFP	dsGFP	dsHif-1α1	dsHif-1α2					10.2811	20.2792	6.96441	18.8959				2.07053	7.56846	3.36359	11.1579
6.86852	5.85634	4.28709				54.9482	34.2968	26.7228			0.632603	1.14975	0.481631	1.14487				28.8786	35.2139	27.2479	48.1036					9.20188	16.0214	6.6807	18.1261				2.34567	5.91589	3.69062	5.35171
3.18215	4.25748	5.38893				25.4572	43.1115	25.4572			0.693197	0.986708	0.568803	0.785867				20.2792	38.2681	34.9706	42.7565					9.52638	13.7554	10.0561	17.6305				3.75809	5.64044	3.73213	5.57897
7.56846	6.32033	4.78991				60.5477	38.3193	36.0019			0.683197	0.862776	0.705149	1.28127				26.0268	64.3591	16.4278	58.4071					12.6576	15.4756	7.72749	21.259				3.34035	5.56416	2.91768	5.73582
Column A		Column A				Column A		Column A			0.619379	1.21416	0.705149	1.78688				26.5737	55.2565	26.8727	59.2224					16.358	21.5846	9.57983	18.6357				4.81589	7.21	3.11666	10.7034
vs		vs				vs		vs			0.743668	0.931301	0.730016	1.32998				29.4854	32.1795	24.728	72.4077
Column C		Column B				Column C		Column B			Bonferroni's Multiple Comparison Test	Mean Diff.	t	Significant? P < 0.05?	Summary	95% CI of diff		Bonferroni's Multiple Comparison Test	Mean Diff.	t	Significant? P < 0.05?	Summary	95% CI of diff			Bonferroni's Multiple Comparison Test	Mean Diff.	t	Significant? P < 0.05?	Summary	95% CI of diff		Tukey's Multiple Comparison Test	Mean Diff.	q	Significant? P < 0.05?	Summary	95% CI of diff
											Column A vs Column B	-0.3545	2.749	Yes	*	-0.7425 to 0.03347		Column A vs Column B	-18.81	3.033	Yes	*	-37.46 to -0.1551			Column A vs Column B	-5.818	3.727	Yes	*	-10.51 to -1.122		Column A vs Column B	-3.114	4.208	Yes	*	-6.108 to -0.1197
Unpaired t test		Unpaired t test				Unpaired t test		Unpaired t test			Column A vs Column C	0.03626	0.2811	No	ns	-0.3517 to 0.4243		Column A vs Column C	0.1993	0.03215	No	ns	-18.45 to 18.85			Column A vs Column C	3.403	2.18	No	ns	-1.293 to 8.100		Column A vs Column C	-0.09803	0.1325	No	ns	-3.092 to 2.896
P value	0.3473	P value	0.8939			P value	0.0774	P value	0.3473		Column A vs Column D	-0.5914	4.585	Yes	**	-0.9794 to -0.2034		Column A vs Column D	-29.93	4.828	Yes	**	-48.58 to -11.28			Column A vs Column D	-7.304	4.679	Yes	**	-12.00 to -2.608		Column A vs Column D	-4.439	5.999	Yes	**	-7.433 to -1.445
P value summary	ns	P value summary	ns			P value summary	ns	P value summary	ns		Column B vs Column C	0.3908	3.03	Yes	*	0.002786 to 0.7788		Column B vs Column C	19.01	3.066	Yes	*	0.3544 to 37.66			Column B vs Column C	9.222	5.907	Yes	***	4.525 to 13.92		Column B vs Column C	3.016	4.075	Yes	*	0.02165 to 6.010
Are means signif. different? (P < 0.05)	No	Are means signif. different? (P < 0.05)	No			Are means signif. different? (P < 0.05)	No	Are means signif. different? (P < 0.05)	No		Column B vs Column D	-0.2368	1.836	No	ns	-0.6248 to 0.1512		Column B vs Column D	-11.12	1.794	No	ns	-29.78 to 7.528			Column B vs Column D	-1.486	0.952	No	ns	-6.183 to 3.210		Column B vs Column D	-1.326	1.792	No	ns	-4.320 to 1.668
One- or two-tailed P value?	Two-tailed	One- or two-tailed P value?	Two-tailed			One- or two-tailed P value?	Two-tailed	One- or two-tailed P value?	Two-tailed		Column C vs Column D	-0.6276	4.866	Yes	**	-1.016 to -0.2396		Column C vs Column D	-30.13	4.86	Yes	**	-48.78 to -11.48			Column C vs Column D	-10.71	6.859	Yes	***	-15.40 to -6.011		Column C vs Column D	-4.341	5.867	Yes	**	-7.335 to -1.347
t, df	t=0.9984 df=8	t, df	t=0.1377 df=8			t, df	t=2.025 df=8	t, df	t=0.9984 df=8
