# Supplementary material for: Non-canonical function of an Hif-1α splice variant contributes to the sustained flight of locusts
Source: eLife. 2022 Aug 30;11:e74554. doi: 10.7554/eLife.74554 (PMC9427102; doi:10.7554/eLife.74554)
Supplement: Figure 2—figure supplement 3—source data 1. [file elife-74554-fig2-figsupp3-data1.xlsx]

## Sheet: Sheet1
Figure 2-figure supplement 3A															Figure 2-figure supplement 3B
	PDK exression level								BNIP3 exression level						PDK exression level							BNIP3 exression level
flight duration	0	15	30	60(min)				flight duration	0	15	30	60(min)			dsGFP	dsHif-1α1	dsHif-1α2					dsGFP	dsHif-1α1	dsHif-1α2
	0.0418102	0.0277763	0.0210505	0.080772					12.5534	7.51618	6.27667	6.45313			0.0243489	0.0220971	0.0255594					35.2139	27.2479	12.2786
	0.0319066	0.0301855	0.0330318	0.0166308					26.1729	12.042	5.02805	8.33973			0.0222508	0.0224055	0.0277763					38.2681	34.9706	21.3783
	0.0246888	0.0607909	0.0463914	0.0457527					7.88986	15.6707	10.5561	22.0087			0.0225614	0.0200535	0.0268302					91.0175	16.4278	29.2035
	0.046714	0.0629347	0.0235195	0.0544094					11.8762	12.295	5.42642	6.02099			0.0228763	0.0328036	0.0185814					55.2565	26.8728	59.2224
	0.0401071	0.0421011	0.0293601	0.0363979					5.31474	9.25351	11.5514	12.8171			0.0344345	0.0219445						32.1795	48.4382	72.4077
	0.0255594	0.0406669	0.0612138	0.047039					9.38268	18.0009	10.5561	3.86375
	0.034674	0.0207607	0.0500669	0.0382075					7.6211	13.3614	6.10504	11.5514
	0.0612138	0.0896222	0.0382075	0.0406669					10.2674	19.0273	10.0561	8.87655
	0.0412346	0.03983	0.0500669	0.018199					23.7524	6.02099	8.87655	22.9433
		0.0432847	0.0321286	0.0426888						5.27803	16.9123	16.6794
															Table Analyzed	Data 1		Table Analyzed	Data 1			Table Analyzed	Data 1		Table Analyzed	Data 1
Bonferroni's Multiple Comparison Test	Mean Diff.	t	Significant? P < 0.05?	Summary	95% CI of diff			Bonferroni's Multiple Comparison Test	Mean Diff.	t	Significant? P < 0.05?	Summary	95% CI of diff		Column A			Column A				Column A			Column A
Column A vs Column B	-0.007139	0.9573	No	ns	-0.02799 to 0.01372			Column A vs Column B	0.9123	0.3462	No	ns	-6.459 to 8.283		vs	vs		vs	vs			vs	vs		vs	vs
Column A vs Column C	0.0001528	0.02049	No	ns	-0.02070 to 0.02101			Column A vs Column C	3.624	1.375	No	ns	-3.746 to 11.00		Column B			Column C				Column B			Column C
Column A vs Column D	-0.00342	0.4586	No	ns	-0.02428 to 0.01744			Column A vs Column D	0.8035	0.3049	No	ns	-6.567 to 8.174
Column B vs Column C	0.007292	1.005	No	ns	-0.01301 to 0.02759			Column B vs Column C	2.712	1.057	No	ns	-4.462 to 9.886		Unpaired t test			Unpaired t test				Unpaired t test			Unpaired t test
Column B vs Column D	0.003719	0.5123	No	ns	-0.01658 to 0.02402			Column B vs Column D	-0.1088	0.04241	No	ns	-7.283 to 7.065		P value	0.6702		P value	0.8548			P value	0.1451		P value	0.4894
Column C vs Column D	-0.003573	0.4922	No	ns	-0.02387 to 0.01673			Column C vs Column D	-2.821	1.1	No	ns	-9.995 to 4.353		P value summary	ns		P value summary	ns			P value summary	ns		P value summary	ns
															Are means signif. different? (P < 0.05)	No		Are means signif. different? (P < 0.05)	No			Are means signif. different? (P < 0.05)	No		Are means signif. different? (P < 0.05)	No
															One- or two-tailed P value?	Two-tailed		One- or two-tailed P value?	Two-tailed			One- or two-tailed P value?	Two-tailed		One- or two-tailed P value?	Two-tailed
															t, df	t=0.4420 df=8		t, df	t=0.1899 df=7			t, df	t=1.615 df=8		t, df	t=0.7246 df=8
															How big is the difference?			How big is the difference?				How big is the difference?			How big is the difference?
															Mean ± SEM of column Ae	0.02529 ?0.002313 N=5		Mean ± SEM of column Aa	0.02529 ?0.002313 N=5			Mean ± SEM of column Ae	50.39 ?10.92 N=5y		Mean ± SEM of column Ae	50.39 ?10.92 N=5
															Mean ± SEM of column Ba	0.02386 ?0.002273 N=5		Mean ± SEM of column Ca	0.02469 ?0.002085 N=4			Mean ± SEM of column Be	30.79 ?5.306 N=5y		Mean ± SEM of column C؀	38.90 ?11.50 N=5
															Difference between means	0.001434 ?0.003243N		Difference between means	0.0006076 ?0.003199			Difference between means	19.60 ?12.14＀		Difference between means	11.49 ?15.86
															95% confidence interval	-0.006046 to 0.008913		95% confidence interval	-0.006958 to 0.008173			95% confidence interval	-8.393 to 47.58		95% confidence interval	-25.08 to 48.05
															R squared	0.02384		R squared	0.005126			R squared	0.2458		R squared	0.06158
															F test to compare variances			F test to compare variances				F test to compare variances			F test to compare variances
															F,DFn, Dfd	1.035, 4, 4		F,DFn, Dfd	1.538, 4, 3			F,DFn, Dfd	4.232, 4, 4		F,DFn, Dfd	1.110, 4, 4
															P value	0.974		P value	0.7537			P value	0.1912		P value	0.9218
															P value summary	ns		P value summary	ns			P value summary	ns		P value summary	ns
															Are variances significantly different?	No		Are variances significantly different?	No			Are variances significantly different?	No		Are variances significantly different?	No
