# Supplementary material for: Non-canonical function of an Hif-1α splice variant contributes to the sustained flight of locusts
Source: eLife. 2022 Aug 30;11:e74554. doi: 10.7554/eLife.74554 (PMC9427102; doi:10.7554/eLife.74554)
Supplement: Figure 2—source data 1. — Raw data for lactate content, pyruvate dehydrogenase (PDH) activity, mitochondrial DNA copy number measurement, and flight performance test in the absence of Hif-1α1 and Hif-1α2, respectively. [file elife-74554-fig2-data1.xlsx]

## Sheet: Sheet1
Figure 2A				Figure 2B																	Figure 2C
dsHif-1α1				Hemolymph lactate									Muscle PDH activity								Muscle mitochondrial DNA content
dsGFP	dsHif-1α1	dsHif-1α2		Normoxia	Normoxia	Normoxia	Hypoxia	Hypoxia	Hypoxia				Normoxia	Normoxia	Normoxia	Hypoxia	Hypoxia	Hypoxia			Normoxia	Normoxia	Normoxia	Hypoxia	Hypoxia	Hypoxia
2.82843	1.00696	3.97237		dsGFP	dsHif-1α1	dsHif-1α2	dsGFP	dsHif-1α1	dsHif-1α2				dsGFP	dsHif-1α1	dsHif-1α2	dsGFP	dsHif-1α1	dsHif-1α2			dsGFP	dsHif-1α1	dsHif-1α2	dsGFP	dsHif-1α1	dsHif-1α2
3.91768	0.790041	5.50217		1.89351	2.28492	2.6864	4.75454	1.56301	2.85767				0.251836	0.194506	0.330824	0.190751	0.390117	0.183414			0.678302	0.810003	0.619854	0.885768	0.365388	0.732043
3.97237	0.532185	4.92458		1.94586	1.85398	1.8061	2.80426	2.72875	4.17811				0.294273	0.485449	0.42261	0.144896	0.299355	0.165141			1.28343	1.12975	1.28343	0.664343	0.615572	1.18099
5.24157	1.1487	5.02805		1.193	2.45435	2.15785	3.23888	1.79689	3.52618				0.47733	0.284397	0.376016	0.138015	0.209018	0.117339			0.806642	1.12975	0.806642	1.21841	0.524858	0.829319
3.605	0.602904	3.73213		2.63301	2.27203	1.87424	3.77295	2.5759	3.12654				0.198324	0.225274	0.307013	0.0778158	0.334934	0.153109			1.21419	0.892547	1.21419	1.04066	0.476319	1.55563
				1.95811	1.88898	2.07498	2.37203	2.13207	4.65141				0.326643	0.510951	0.251153	0.100731	0.318877	0.131193			1.47427	1.01818	1.47427	1.63864	0.590496	1.1607
dsHif-1α2				Bonferroni's Multiple Comparison Test	Mean Diff.	t	Significant? P < 0.05?	Summary	95% CI of diff				Bonferroni's Multiple Comparison Test	Mean Diff.	t	Significant? P < 0.05?	Summary	95% CI of diff			Bonferroni's Multiple Comparison Test	Mean Diff.	q	Significant? P < 0.05?	Summary	95% CI of diff
dsGFP	dsHif-1α1	dsHif-1α2		Column A vs Column B	-0.2262	0.6045	No	ns	-1.445 to 0.9929				Column A vs Column B	-0.03043	0.5602	No	ns	-0.2075 to 0.1466			Column A vs Column B	0.09532	0.7307	No	ns	-0.4751 to 0.6658
6.40856	6.02099	1.26576		Column A vs Column C	-0.1952	0.5218	No	ns	-1.414 to 1.024				Column A vs Column C	-0.02784	0.5125	No	ns	-0.2049 to 0.1492			Column A vs Column C	0.01169	0.08961	No	ns	-0.5587 to 0.5821
4.22807	8.33973	0.543367		Column A vs Column D	-1.464	3.913	Yes	**	-2.683 to -0.2448				Column A vs Column D	0.1792	3.299	Yes	*	0.002215 to 0.3563			Column A vs Column D	0.001802	0.01382	No	ns	-0.5686 to 0.5722
5.1337	7.1602	1.02101		Column A vs Column E	-0.2346	0.6272	No	ns	-1.454 to 0.9844				Column A vs Column E	-0.0007791	0.01434	No	ns	-0.1778 to 0.1762			Column A vs Column E	0.5768	4.422	Yes	*	0.006402 to 1.147
5.85634	6.96441	0.692555		Column A vs Column F	-1.743	4.66	Yes	**	-2.962 to -0.5243				Column A vs Column F	0.1596	2.938	No	ns	-0.01738 to 0.3367			Column A vs Column F	-0.0003712	0.002846	No	ns	-0.5708 to 0.5701
5.6962	4.34694	2.25012		Column B vs Column C	0.03094	0.0827	No	ns	-1.188 to 1.250				Column B vs Column C	0.002593	0.04772	No	ns	-0.1744 to 0.1796			Column B vs Column C	-0.08363	0.6411	No	ns	-0.6541 to 0.4868
				Column B vs Column D	-1.238	3.308	Yes	*	-2.457 to -0.01866				Column B vs Column D	0.2097	3.859	Yes	*	0.03265 to 0.3867			Column B vs Column D	-0.09352	0.7169	No	ns	-0.6640 to 0.4769
				Column B vs Column E	-0.008471	0.02264	No	ns	-1.227 to 1.211				Column B vs Column E	0.02966	0.5458	No	ns	-0.1474 to 0.2067			Column B vs Column E	0.4815	3.691	No	ns	-0.08892 to 1.052
				Column B vs Column F	-1.517	4.055	Yes	**	-2.736 to -0.2981				Column B vs Column F	0.1901	3.499	Yes	*	0.01305 to 0.3671			Column B vs Column F	-0.09569	0.7336	No	ns	-0.6661 to 0.4747
				Column C vs Column D	-1.269	3.391	Yes	*	-2.488 to -0.04960				Column C vs Column D	0.2071	3.812	Yes	*	0.03006 to 0.3841			Column C vs Column D	-0.009887	0.0758	No	ns	-0.5803 to 0.5606
				Column C vs Column E	-0.03941	0.1053	No	ns	-1.258 to 1.180				Column C vs Column E	0.02706	0.4981	No	ns	-0.1500 to 0.2041			Column C vs Column E	0.5652	4.332	No	ns	-0.005287 to 1.136
				Column C vs Column F	-1.548	4.138	Yes	**	-2.767 to -0.3290				Column C vs Column F	0.1875	3.451	Yes	*	0.01046 to 0.3645			Column C vs Column F	-0.01206	0.09246	No	ns	-0.5825 to 0.5584
				Column D vs Column E	1.229	3.286	Yes	*	0.01019 to 2.448				Column D vs Column E	-0.18	3.314	Yes	*	-0.3570 to -0.002994			Column D vs Column E	0.575	4.408	Yes	*	0.004600 to 1.145
				Column D vs Column F	-0.2794	0.747	No	ns	-1.498 to 0.9396				Column D vs Column F	-0.0196	0.3607	No	ns	-0.1966 to 0.1574			Column D vs Column F	-0.002173	0.01666	No	ns	-0.5726 to 0.5683
				Column E vs Column F	-1.509	4.033	Yes	**	-2.728 to -0.2896				Column E vs Column F	0.1604	2.953	No	ns	-0.01660 to 0.3374			Column E vs Column F	-0.5772	4.425	Yes	*	-1.148 to -0.006773
Figure 2D										Figure 2F
Hif-1α1				Hif-1α2						Muscle lactate								Muscle PDH activity								Muscle mitochondrial DNA content
0	15	30	60(min)	0	15	30	60(min)			Normoxia	Hypoxia	Hypoxia	Hypoxia					Normoxia	Hypoxia	Hypoxia	Hypoxia					Normoxia	Hypoxia	Hypoxia	Hypoxia
16.1475	38.3193	24.4201	43.1115	34.7755	66.257	60.1295	114.563			dsGFP	dsGFP	dsHif-1α1	dsHif-1α2					dsGFP	dsGFP	dsHif-1α1	dsHif-1α2					dsGFP	dsGFP	dsHif-1α1	dsHif-1α2
22.9433	20.9663	24.084	20.6776	46.5271	64	96.3358	32.4467			4.18728	5.63666	4.97263	3.35271					0.264918	0.232368	0.146989	0.144942					1.19086	1.26225	0.810003	0.850274
27.4741	38.3193	17.6305	32.6724	69.0706	103.968	69.0706	50.2134			5.13094	7.78662	4.23365	4.80444					0.117535	0.208698	0.293645	0.113554					1.01537	0.91764	1.12975	0.976708
18.8959	31.125	21.259	40.5042	60.9688	99.7331	254.232	98.36			4.6352	4.77357	5.15533	5.56633					0.20456	0.238927	0.148108	0.202133					0.836246	0.91764	1.12975	0.740207
27.0958	9.64646	33.1285	38.1197	64.4451	127.73	66.7178	183.546			4.62167	3.48273	5.67776	4.62519					0.216432	0.342384	0.1806	0.1493					1.16635	1.16959	0.892547	0.75054
18.8959	34.0598	25.8125	25.1067	58.4852	68.5935	164.893	107.635			4.7577	4.98065	3.5247	3.2747					0.224822	0.207342	0.176613	0.21475					0.84792	0.844401	1.01818	1.09885
19.4271	13.5479	28.84	18.8959	21.1121	54.5686	85.0359	91.7731
20.6776	37.7918	45.8866	40.7859	37.2715	68.1197	261.379	205.074			Bonferroni's Multiple Comparison Test	Mean Diff.	t	Significant? P < 0.05?	Summary	95% CI of diff			Tukey's Multiple Comparison Test	Mean Diff.	q	Significant? P < 0.05?	Summary	95% CI of diff			Bonferroni's Multiple Comparison Test	Mean Diff.	t	Significant? P < 0.05?	Summary	95% CI of diff
28.84	30.6964	44.9422	15.2422	39.3966	86.8227	256	114.563			Column A vs Column B	-0.6655	1.016	No	ns	-2.637 to 1.306			Column A vs Column B	-0.04029	1.681	No	ns	-0.1372 to 0.05666			Column A vs Column B	-0.01096	0.1066	No	ns	-0.3201 to 0.2982
										Column A vs Column C	-0.04626	0.07059	No	ns	-2.018 to 1.925			Column A vs Column C	0.01646	0.687	No	ns	-0.08049 to 0.1134			Column A vs Column C	0.0153	0.1489	No	ns	-0.2938 to 0.3244
Bonferroni's Multiple Comparison Test	Mean Diff.	t	Significant? P < 0.05?	Summary	95% CI of diff					Column A vs Column D	0.3419	0.5218	No	ns	-1.629 to 2.313			Column A vs Column D	0.04072	1.699	No	ns	-0.05623 to 0.1377			Column A vs Column D	0.128	1.246	No	ns	-0.1811 to 0.4372
Column A vs Column B	-5.11	1.216	No	ns	-16.86 to 6.639					Column B vs Column C	0.6192	0.945	No	ns	-1.352 to 2.590			Column B vs Column C	0.05675	2.368	No	ns	-0.04020 to 0.1537			Column B vs Column C	0.02626	0.2555	No	ns	-0.2829 to 0.3354
Column A vs Column C	-7.044	1.677	No	ns	-18.79 to 4.706					Column B vs Column D	1.007	1.537	No	ns	-0.9639 to 2.979			Column B vs Column D	0.08101	3.381	No	ns	-0.01594 to 0.1780			Column B vs Column D	0.139	1.353	No	ns	-0.1702 to 0.4481
Column A vs Column D	-8.012	1.907	No	ns	-19.76 to 3.738					Column C vs Column D	0.3881	0.5923	No	ns	-1.583 to 2.359			Column C vs Column D	0.02425	1.012	No	ns	-0.07270 to 0.1212			Column C vs Column D	0.1127	1.097	No	ns	-0.1964 to 0.4219
Column E vs Column F	-34.19	1.86	No	ns	-79.39 to 11.00
Column E vs Column G	-97.97	5.33	Yes	***	-143.2 to -52.78
Column E vs Column H	-62.9	3.422	Yes	**	-108.1 to -17.71
Figure 2E
1h				2h				3h				1h				2h				3h				1h				2h				3h
flight distance(km)				flight distance(km)				flight distance(km)				flight duration(h)				flight duration(h)				flight duration(h)				flight speed(km/h)				flight speed(km/h)				flight speed(km/h)
dsGFP	dsHif-1α1	dsHif-1α2		dsGFP	dsHif-1α1	dsHif-1α2		dsGFP	dsHif-1α1	dsHif-1α2		dsGFP	dsHif-1α1	dsHif-1α2		dsGFP	dsHif-1α1	dsHif-1α2		dsGFP	dsHif-1α1	dsHif-1α2		dsGFP	dsHif-1α1	dsHif-1α2		dsGFP	dsHif-1α1	dsHif-1α2		dsGFP	dsHif-1α1	dsHif-1α2
0.843706	0.631837	0.413936		2.75053	1.419	0.901009		10.3504	0.722729	9.73078		0.21145	0.21464	0.16508		1.07638	0.55557	0.31636		2.14453	0.30775	2.37713		3.52298	2.7224	2.24258		2.44467	2.25691	2.4119		4.82641	2.34843	4.0935
2.36675	2.38711	1.10383		2.23706	4.17706	1.70777		8.85181	11.6786	1.47267		0.79197	0.651	0.29823		0.7576	1.07016	0.5525		2.44742	2.9929	0.55437		2.95987	3.56954	3.32457		2.71696	3.7933	2.8781		3.6168	3.90209	2.65648
0.996765	1.61051	0.202067		0.385285	1.2501	0.608464		7.49113	1.07863	0.541487		0.26065	0.41737	0.07096		0.15165	0.48201	0.20569		2.74053	0.23984	0.17024		3.26007	3.78644	2.48636		1.81473	2.35263	2.04175		2.73346	4.49727	3.18073
2.41727	2.06742	1.09101		3.88075	4.32635	0.805253		4.47516	0.544046	0.384461		0.57815	0.84183	0.36739		1.11034	0.98695	0.27586		1.15725	0.22729	0.19046		4.11453	2.42541	2.80545		3.4659	4.35987	2.36696		3.86706	2.39362	2.01859
3.3424	1.6859	0.380761		0.969621	4.76291	1.62031		0.401528	0.360289	0.204515		0.76829	0.52381	0.11002		0.32042	1.53297	0.50807		0.17675	0.16626	0.11445		4.29549	3.02998	3.17986		2.58136	3.07648	2.9146		2.27173	2.16702	1.78694
4.07904	1.05181	0.723823		3.99837	1.92869	1.02617		2.2208	4.44962	0.954401		1.03647	0.27	0.22428		1.17571	0.69977	0.34372		0.56291	1.32075	0.3127		3.93552	3.80342	2.89786		3.30013	2.50728	2.79464		3.94522	3.36901	3.05213
1.88797	0.82938	4.18762		2.75279	1.69269	0.262386		6.25382	1.31627	1.83935		0.55126	0.23396	0.95763		0.73273	0.51344	0.08703		1.88786	0.45551	0.56276		3.32909	3.32905	4.36424		3.66017	3.12789	1.5421		3.31265	2.88966	3.26845
1.97845	2.64195	0.668028		1.08649	0.53005	4.87676		6.30711	1.45662	1.04248		0.48891	0.6758	0.18074		0.28665	0.14109	1.4836		2.59037	0.65118	0.44766		3.96029	3.82458	3.47498		3.65089	3.61253	3.24696		2.43483	2.23689	2.32874
0.582828	1.25387	0.806007		1.38733	0.609218	0.69668		5.90742	2.26735	0.634383		0.19711	0.38278	0.28331		0.38314	0.19983	0.2663		1.26485	0.53742	0.25963		2.31806	2.99796	2.43778		3.40644	2.71287	2.48024		4.67046	4.21895	2.44341
2.67815	0.299331	1.94527		3.64701	0.441834	1.08724		0.776708	5.54909	0.190699		0.64899	0.11197	0.52501		1.35812	0.14339	0.44967		0.21158	1.47349	0.08272		4.08597	2.49824	3.51564		2.6548	1.93504	2.19654		3.67099	3.76595	2.30535
0.706481	1.02994	2.23631		7.10025	4.38818	1.82388		8.10316	0.585265	2.48582		0.21301	0.31584	0.55372		2.0065	1.34623	0.49677		2.56326	0.19797	0.87441		3.21047	3.0461	3.92296		3.53825	3.2176	3.48632		3.16127	2.95633	2.84285
0.721561	1.13701	1.92567		1.9038	1.87591	2.60576		1.53789	2.4278	0.272482		0.25124	0.37622	0.82522		0.54329	0.5443	0.71832		0.39551	0.75909	0.19318		2.55389	2.6895	2.29241		3.42095	3.38551	3.44704		3.88836	3.1983	1.41051
1.96789	2.02972	3.72166		5.0268	1.18903	0.417706		2.08577	5.05777	0.593157		0.64285	0.64916	1.04575		1.39632	0.33517	0.16512		0.83416	1.23382	0.25905		3.01781	3.10113	3.55812		3.58221	3.34958	1.86304		2.50044	4.09928	2.28974
1.58487	1.23125	1.12871		2.72112	0.974899	1.09252		1.30634	12.8845	2.73252		0.47228	0.34556	0.35244		1.1445	0.27648	0.33445		0.28258	2.94397	0.77172		3.08279	3.42342	3.05495		2.26425	3.10069	3.03441		4.62291	4.37658	3.54082
2.95787	0.894977	1.30364		3.13807	1.08347	2.48739		0.373075	1.69303	4.1432		0.57159	0.25003	0.29267		0.81018	0.35484	0.72546		0.17089	0.43616	1.47012		5.14975	3.10302	4.08588		3.80816	2.8048	3.36219		2.18313	3.88168	2.81827
0.342308	1.08724	0.587352		1.27272	2.6691	0.656719		0.288981	1.27614	0.656076		0.09784	0.14189	0.14649		0.43261	0.88175	0.28021		0.12338	0.35554	0.35698		3.32911	2.8376	3.86539		2.75896	2.98258	1.9535		2.3422	3.5893	1.83785
0.772078	2.23556	1.00883		0.75926	0.91458	0.564733		0.588225	2.25775	0.543035		0.27034	0.5199	0.23808		0.28809	0.30201	0.19687		0.32644	0.73128	0.1863		2.51011	4.24052	3.71481		2.00214	2.71874	2.4894		1.80194	3.0874	2.91484
0.520248	3.54899	0.134963		2.34111	2.7543	1.66705		1.24527	1.77719	4.1097		0.15954	1.03622	0.05397		0.68664	1.04224	0.52631		0.39567	0.71609	0.93052		2.39607	3.42058	1.71836		3.31399	2.57973	2.94682		3.14725	2.4818	4.41656
0.857278	3.00613	2.55675		1.95658	2.36373	1.09629		0.915589	1.60006	0.517372		0.248	0.86612	0.62451		0.68466	0.64738	0.44874		0.40511	0.39925	0.18816		3.20138	3.45513	4.00347		2.70137	3.53011	2.05659		2.2601	4.00766	2.74964
1.09855	1.56527	1.42955		2.15337	1.39487	1.58563		0.885046	0.818237	0.601551		0.33385	0.67211	0.34327		0.71906	0.43957	0.51778		0.43654	0.45183	0.23727		3.13246	2.24475	4.09202		2.89404	3.10464	2.82063		2.02741	1.81094	2.5353
1.70249	1.43634	0.917596		0.679338	1.20185	1.16189		0.776485	0.988588	0.781391		0.52634	0.42655	0.29877		0.27342	0.36418	0.32282		0.34316	0.37157	0.32071		3.04693	3.15875	2.99301		1.89171	3.05792	3.38897		2.26275	2.66057	2.43644
3.20141	2.17826	2.14583		1.00807	2.00258	2.46929		1.32807	3.16096	1.15445		0.88972	0.64001	0.54635		0.35068	0.61803	0.83371		0.5091	0.8511	0.49164		3.58297	3.33043	3.77854		2.75852	2.98772	2.90574		2.60867	3.71397	2.34816
0.232981	0.745688	0.43731		1.93773	1.09403	0.699696		3.2803	0.634878	2.92396		0.07018	0.26657	0.10413		0.48808	0.42487	0.24185		0.96468	0.34172	1.50611		2.20243	2.37873	4.03311		3.86507	2.35314	2.24776		3.4004	1.85789	1.9414
1.02315	2.33659	0.401873		1.40542	0.516478	1.13776		1.5216	0.950002	0.53728		0.32881	0.49498	0.15347		0.5562	0.22034	0.45205		0.51867	0.3117	0.2377		2.77002	4.6307	2.21572		2.35196	1.9847	2.15328		2.93365	3.04781	2.26033
1.30967	0.576796	3.19462		1.04879	1.80353	2.33433		1.17352	0.748888	1.38185		0.37193	0.14734	0.98247		0.40158	0.54152	0.59297		0.31159	0.26831	0.49235		3.23138	3.64863	3.24241		2.26431	3.11607	3.74213		3.76624	2.79113	2.80665
1.47479	1.09704	1.01335		1.61428	1.94226	1.51777		1.962	1.32169	3.8646		0.46671	0.32369	0.28978		0.60466	0.62008	0.51822		0.50053	0.47011	1.04555		3.09696	3.03745	3.20816		2.52757	2.9742	2.79495		3.91985	2.81145	3.69624
1.26744	0.18548	1.17395		1.89777	1.37149	0.535327		2.63994	1.51704	0.552646		0.24046	0.05201	0.34327		0.49123	0.43924	0.15505		0.827	0.57294	0.14726		4.93227	3.2618	3.24419		3.74666	2.90614	2.80585		3.19219	2.64781	3.75286
1.01335	0.622035	1.09252		1.50269	5.93987	0.705727		2.53559	0.566072	0.757755		0.35318	0.11319	0.29464		0.368	1.70526	0.21869		1.13468	0.25692	0.45956		2.60877	4.78275	3.38299		4.00758	3.47707	2.73404		2.23463	2.2033	1.64887
0.760768	2.68192	0.26691		0.626559	3.19538	3.25268		2.33834	1.84832	0.247292		0.3035	0.61673	0.08386		0.19608	0.74363	0.94675		0.71572	0.5519	0.13647		2.12407	4.31193	2.76922		2.6494	4.16823	3.29705		3.26711	3.34901	1.81206
1.0503	2.71811	0.52628		2.54771	2.16695	0.61148		5.92701	2.50096	1.27441		0.37958	0.75756	0.15184		0.6949	0.64464	0.19149		2.07355	0.962607	0.4394		2.63789	3.57802	3.29718		3.46556	3.28546	2.93734		2.85839	2.59811	2.90034
0.495366	4.2977	1.16264		1.35566	2.44969	0.903271		1.51754	1.68666	2.418		0.20733	0.99099	0.261		0.42112	0.65467	0.30248		0.66599	0.41744	0.90124		2.03288	4.33069	4.14257		2.91839	3.59215	2.6522		2.27862	3.98268	2.68297
3.92523	0.490088	0.302347		7.89042	2.02444	1.69043		3.58203	1.9694	0.477534		1.00016	0.19529	0.11877		2.02678	0.49466	0.48216		1.31623	0.55786	0.21839		3.9246	2.02694	1.91717		3.89308	3.94017	3.18694		2.72143	3.38566	2.18661
0.802991	2.70755	0.472747		3.46229	1.21768	1.58638		2.78433	4.3731	1.30967		0.34232	0.69846	0.15097		0.63575	0.40566	0.39073		0.83327	1.33548	0.42954		2.08142	3.79765	2.56705		5.34162	2.67832	3.89216		3.34145	3.22317	2.81379
1.55245	0.307625	0.897993		3.33788	1.4763	3.93956		0.873111	3.6636	1.11966		0.52372	0.11385	0.22039		0.93228	0.41693	0.97759		0.19019	0.97694	0.28484		2.84046	1.9934	3.95482		3.55608	3.34738	4.00981		4.33701	3.56871	3.02292
0.484811	0.296315	0.220917		0.378499	2.94279	5.97003			1.9875	1.2222		0.17121	0.10908	0.06419		0.1125	0.6479	1.59653			0.53187	0.31307		2.27679	2.30176	2.67811		3.12316	4.42335	3.72663			3.6957	3.73053
0.614496	0.646163	0.32949		1.88269	0.760768	0.260878			8.95731			0.24397	0.29332	0.09398		0.47332	0.20613	0.08538			1.76931			2.10461	1.94331	3.32144		3.76736	3.34689	2.45499			5.05237
0.824103	0.500644	1.02919		1.21014	2.96541	0.43731						0.37497	0.19146	0.35005		0.39511	0.77729	0.13571						1.87003	2.13837	2.7161		2.62198	3.70642	2.36123
1.93019	2.54695	1.95583		1.66102	0.860294	0.58132						0.60067	0.68762	0.4984		0.38354	0.26362	0.1874						3.16821	3.62068	3.84555		4.1853	2.89157	2.8566
2.66231	1.73567	0.43731		4.42663	6.25956	0.356634						0.88258	0.49225	0.15365		1.14119	1.37029	0.10605						2.99772	3.39426	1.94323		3.82478	4.54715	2.43862
Parameter				Parameter				Parameter				Parameter				Parameter				Parameter				Parameter				Parameter				Parameter
Table Analyzed	Data 1			Table Analyzed	Data 1			Table Analyzed	Data 1			Table Analyzed	Data 1			Table Analyzed	Data 1			Table Analyzed	Data 1			Table Analyzed	Data 1			Table Analyzed	Data 1			Table Analyzed	Data 1
Column A				Column A				Column A				Column A				Column A				Column A				Column A				Column A				Column A
vs	vs			vs	vs			vs	vs			vs	vs			vs	vs			vs	vs			vs	vs			vs	vs			vs	vs
Column B				Column B				Column B				Column B				Column B				Column B				Column B				Column B				Column B
Unpaired t test				Unpaired t test				Unpaired t test				Unpaired t test				Unpaired t test				Unpaired t test				Unpaired t test				Unpaired t test				Unpaired t test
P value	0.8837			P value	0.5453			P value	0.6267			P value	0.9874			P value	0.4282			P value	0.2911			P value	0.5201			P value	0.9271			P value	0.6459
P value summary	ns			P value summary	ns			P value summary	ns			P value summary	ns			P value summary	ns			P value summary	ns			P value summary	ns			P value summary	ns			P value summary	ns
Are means signif. different? (P < 0.05)	No			Are means signif. different? (P < 0.05)	No			Are means signif. different? (P < 0.05)	No			Are means signif. different? (P < 0.05)	No			Are means signif. different? (P < 0.05)	No			Are means signif. different? (P < 0.05)	No			Are means signif. different? (P < 0.05)	No			Are means signif. different? (P < 0.05)	No			Are means signif. different? (P < 0.05)	No
One- or two-tailed P value?	Two-tailed			One- or two-tailed P value?	Two-tailed			One- or two-tailed P value?	Two-tailed			One- or two-tailed P value?	Two-tailed			One- or two-tailed P value?	Two-tailed			One- or two-tailed P value?	Two-tailed			One- or two-tailed P value?	Two-tailed			One- or two-tailed P value?	Two-tailed			One- or two-tailed P value?	Two-tailed
t, df	t=0.1467 df=76			t, df	t=0.6076 df=76			t, df	t=0.4886 df=68			t, df	t=0.01585 df=76			t, df	t=0.7966 df=76			t, df	t=1.064 df=68			t, df	t=0.6462 df=76			t, df	t=0.09183 df=76			t, df	t=0.4615 df=68
How big is the difference?				How big is the difference?				How big is the difference?				How big is the difference?				How big is the difference?				How big is the difference?				How big is the difference?				How big is the difference?				How big is the difference?
Mean ± SEM of column A	1.514 ?0.1621 N=39			Mean ± SEM of column A	2.342 ?0.2672 N=39			Mean ± SEM of column A	3.018 ?0.4698 N=34			Mean ± SEM of column A	0.4377 ?0.04009 N=39			Mean ± SEM of column A	0.6926 ?0.07307 N=39			Mean ± SEM of column A	0.9418 ?0.1379 N=34			Mean ± SEM of column A	3.100 ?0.1252 N=39			Mean ± SEM of column A	3.147 ?0.1173 N=39			Mean ± SEM of column A	3.130 ?0.1410 N=34
Mean ± SEM of column B	1.547 ?0.1595 N=39			Mean ± SEM of column B	2.127 ?0.2332 N=39			Mean ± SEM of column B	2.685 ?0.4901 N=36			Mean ± SEM of column B	0.4386 ?0.04230 N=39			Mean ± SEM of column B	0.6168 ?0.06100 N=39			Mean ± SEM of column B	0.7540 ?0.1117 N=36			Mean ± SEM of column B	3.211 ?0.1170 N=39			Mean ± SEM of column B	3.161 ?0.1002 N=39			Mean ± SEM of column B	3.219 ?0.1316 N=36
Difference between means	-0.03337 ?0.2274			Difference between means	0.2155 ?0.3547			Difference between means	0.3324 ?0.6803			Difference between means	-0.0009238 ?0.05828			Difference between means	0.07582 ?0.09518			Difference between means	0.1878 ?0.1765			Difference between means	-0.1107 ?0.1714			Difference between means	-0.01416 ?0.1542			Difference between means	-0.08892 ?0.1927
95% confidence interval	-0.4870 to 0.4203			95% confidence interval	-0.4920 to 0.9230			95% confidence interval	-1.026 to 1.691			95% confidence interval	-0.1172 to 0.1153			95% confidence interval	-0.1140 to 0.2657			95% confidence interval	-0.1648 to 0.5403			95% confidence interval	-0.4525 to 0.2311			95% confidence interval	-0.3218 to 0.2935			95% confidence interval	-0.4738 to 0.2959
R squared	0.0002831			R squared	0.004834			R squared	0.003498			R squared	3.306e-06			R squared	0.00828			R squared	0.01637			R squared	0.005465			R squared	0.0001109			R squared	0.003122
Parameter				Parameter				Parameter				Parameter				Parameter				Parameter				Parameter				Parameter				Parameter
Table Analyzed	Data 1			Table Analyzed	Data 1			Table Analyzed	Data 1			Table Analyzed	Data 1			Table Analyzed	Data 1			Table Analyzed	Data 1			Table Analyzed	Data 1			Table Analyzed	Data 1			Table Analyzed	Data 1
Column A				Column A				Column A				Column A				Column A				Column A				Column A				Column A				Column A
vs	vs			vs	vs			vs	vs			vs	vs			vs	vs			vs	vs			vs	vs			vs	vs			vs	vs
Column C				Column C				Column C				Column C				Column C				Column C				Column C				Column C				Column C
Unpaired t test				Unpaired t test				Unpaired t test				Unpaired t test				Unpaired t test				Unpaired t test				Unpaired t test				Unpaired t test				Unpaired t test
P value	0.1272			P value	0.012			P value	0.0097			P value	0.0628			P value	0.0102			P value	0.0089			P value	0.6067			P value	0.0209			P value	0.0233
P value summary	ns			P value summary	*			P value summary	**			P value summary	ns			P value summary	*			P value summary	**			P value summary	ns			P value summary	*			P value summary	*
Are means signif. different? (P < 0.05)	No			Are means signif. different? (P < 0.05)	Yes			Are means signif. different? (P < 0.05)	Yes			Are means signif. different? (P < 0.05)	No			Are means signif. different? (P < 0.05)	Yes			Are means signif. different? (P < 0.05)	Yes			Are means signif. different? (P < 0.05)	No			Are means signif. different? (P < 0.05)	Yes			Are means signif. different? (P < 0.05)	Yes
One- or two-tailed P value?	Two-tailed			One- or two-tailed P value?	Two-tailed			One- or two-tailed P value?	Two-tailed			One- or two-tailed P value?	Two-tailed			One- or two-tailed P value?	Two-tailed			One- or two-tailed P value?	Two-tailed			One- or two-tailed P value?	Two-tailed			One- or two-tailed P value?	Two-tailed			One- or two-tailed P value?	Two-tailed
t, df	t=1.542 df=76			t, df	t=2.574 df=76			t, df	t=2.664 df=67			t, df	t=1.888 df=76			t, df	t=2.633 df=76			t, df	t=2.694 df=67			t, df	t=0.5170 df=76			t, df	t=2.358 df=76			t, df	t=2.322 df=67
How big is the difference?				How big is the difference?				How big is the difference?				How big is the difference?				How big is the difference?				How big is the difference?				How big is the difference?				How big is the difference?				How big is the difference?
Mean ± SEM of column A	1.514 ?0.1621 N=39			Mean ± SEM of column A	2.342 ?0.2672 N=39			Mean ± SEM of column A	3.018 ?0.4698 N=34			Mean ± SEM of column A	0.4377 ?0.04009 N=39			Mean ± SEM of column A	0.6926 ?0.07307 N=39			Mean ± SEM of column A	0.9418 ?0.1379 N=34			Mean ± SEM of column A	3.100 ?0.1252 N=39			Mean ± SEM of column A	3.147 ?0.1173 N=39			Mean ± SEM of column A	3.130 ?0.1410 N=34
Mean ± SEM of column C	1.168 ?0.1552 N=39			Mean ± SEM of column C	1.481 ?0.2015 N=39			Mean ± SEM of column C	1.534 ?0.3055 N=35			Mean ± SEM of column C	0.3287 ?0.04155 N=39			Mean ± SEM of column C	0.4522 ?0.05473 N=39			Mean ± SEM of column C	0.5132 ?0.08160 N=35			Mean ± SEM of column C	3.187 ?0.1124 N=39			Mean ± SEM of column C	2.793 ?0.09393 N=39			Mean ± SEM of column C	2.701 ?0.1198 N=35
Difference between means	0.3461 ?0.2244			Difference between means	0.8616 ?0.3347			Difference between means	1.484 ?0.5571			Difference between means	0.1090 ?0.05774			Difference between means	0.2404 ?0.09129			Difference between means	0.4286 ?0.1591			Difference between means	-0.08698 ?0.1682			Difference between means	0.3544 ?0.1503			Difference between means	0.4287 ?0.1846
95% confidence interval	-0.1016 to 0.7937			95% confidence interval	0.1939 to 1.529			95% confidence interval	0.3713 to 2.597			95% confidence interval	-0.006131 to 0.2242			95% confidence interval	0.05828 to 0.4225			95% confidence interval	0.1107 to 0.7464			95% confidence interval	-0.4226 to 0.2486			95% confidence interval	0.05463 to 0.6541			95% confidence interval	0.05996 to 0.7975
R squared	0.03034			R squared	0.08019			R squared	0.09579			R squared	0.04482			R squared	0.0836			R squared	0.09772			R squared	0.003504			R squared	0.06819			R squared	0.07451
