# Supplementary material for: Non-canonical function of an Hif-1α splice variant contributes to the sustained flight of locusts
Source: eLife. 2022 Aug 30;11:e74554. doi: 10.7554/eLife.74554 (PMC9427102; doi:10.7554/eLife.74554)
Supplement: Figure 3—figure supplement 2—source data 1. [file elife-74554-fig3-figsupp2-data1.xlsx]

## Sheet: Sheet1
Figure 3-figure supplement 2
Dj-1 expression level
Brain				Fat body				Midgut
dsGFP	dsHif-1α1	dsHif-1α2		dsGFP	dsHif-1α1	dsHif-1α2		dsGFP	dsHif-1α1	dsHif-1α2
16.7955	18.507	12.3805		0.668964	0.486328	0.285191		1.52626	1.48452	1.61328
16.2233	14.1233	12.042		0.395021	0.664343	0.287175		1.30134	1.85318	1.71713
17.0299	15.1369	11.7127		0.870551	0.539614	0.273573		1.65864	1.61328	1.71713
19.0273	18.0009	10.5561		0.806642	0.712025	0.25349		1.31951	2.04202	1.49485
ENO expression level
Brain				Fat body				Midgut
dsGFP	dsHif-1α1	dsHif-1α2		dsGFP	dsHif-1α1	dsHif-1α2		dsGFP	dsHif-1α1	dsHif-1α2
52.3457	59.3016	41.9326		1.33793	1.06437	0.432269		0.450625	0.550953	0.469761
53.0765	47.5048	40.7859		1.04972	1.47427	0.406126		0.619854	0.641713	0.438303
48.8403	53.0765	37.7918		1.72907	0.707107	0.392292		0.438303	0.381565	0.840896
52.3457	55.3304	39.6707		1.85318	1.33793	0.381565		0.521233	1.3566	0.602904
LDH expression level
Brain				Fat body				Midgut
dsGFP	dsHif-1α1	dsHif-1α2		dsGFP	dsHif-1α1	dsHif-1α2		dsGFP	dsHif-1α1	dsHif-1α2
0.835088	1.36604	1.30134		0.00897421	0.00849012	0.00511872		2.42839	2.14355	2
1.30134	1.48452	0.90125		0.00579892	0.00552427	0.00445611		2.65737	2.2974	1.89211
1.51572	1.6245	1.71713		0.00680118	0.00497875	0.00975258		2.34567	2.15846	2.67585
1.39474	0.913831	0.795536		0.00808801	0.0100268	0.00608722		1.94531	4.02782	1.8025
PFK expression level
Brain				Fat body				Midgut
dsGFP	dsHif-1α1	dsHif-1α2		dsGFP	dsHif-1α1	dsHif-1α2		dsGFP	dsHif-1α1	dsHif-1α2
7.56846	6.77396	5.65685		0.0279695	0.0330318	0.0106722		0.11344	0.108067	0.0927827
6.77396	5.09824	5.61778		0.0260965	0.0310341	0.00968522		0.15283	0.119908	0.103665
5.6962	6.10504	4.59479		0.0454366	0.0213444	0.00955188		0.118257	0.107321	0.123279
6.06287	6.54322	4.75683		0.0547879	0.0504151	0.00866851		0.112656	0.223756	0.0994421
PGK expression level
Brain				Fat body				Midgut
dsGFP	dsHif-1α1	dsHif-1α2		dsGFP	dsHif-1α1	dsHif-1α2		dsGFP	dsHif-1α1	dsHif-1α2
7.56846	6.77396	5.65685		0.198884	0.186856	0.0683934		0.550953	0.45376	0.469761
10.6295	9.64646	9.38268		0.213159	0.273573	0.0758872		0.582367	0.524858	0.403321
10.6295	11.2356	8.22491		0.316439	0.144586	0.0625		0.521233	0.441351	0.510506
11.3137	11.4716	8.81524		0.356013	0.271684	0.0642571		0.420448	0.779165	0.400535
