# Supplementary material for: Non-canonical function of an Hif-1α splice variant contributes to the sustained flight of locusts
Source: eLife. 2022 Aug 30;11:e74554. doi: 10.7554/eLife.74554 (PMC9427102; doi:10.7554/eLife.74554)
Supplement: Figure 3—source data 1. [file elife-74554-fig3-data1.xlsx]

## Sheet: Sheet1
Figure 3B
	dsGFP	dsGFP	dsGFP	dsGFP	dsHif-1α1	dsHif-1α1	dsHif-1α1	dsHif-1α1	dsHif-1α2	dsHif-1α2	dsHif-1α2	dsHif-1α2
miox	1.04247	1.69349	1.87905	0.598739	2.54912	0.939523	1.48452	1.58008	0.702222	1.31951	1.6552	0.742262
gapdh	1.05263	0.820173	1.87125	1.44794	1.21757	0.961928	0.718968	1.12818	0.46458	0.213751	0.501388	0.333094
GBE	0.98214	0.723969	1.36983	1.96428	0.975355	1.08975	0.831622	1.13603	0.182251	0.294023	0.243839	0.067639
PGK	1.81504	1.72907	0.907519	1.39474	1.27456	1.07923	1.03527	1.44393	0.186856	0.200267	0.287175	0.134904
PGI	1.29954	0.964598	1.22944	1.62225	0.964598	1.09278	0.720964	1.29056	0.217336	0.309498	0.32942	0.184028
ENO	0.759962	1.07475	0.786762	1.07475	0.781328	0.759962	0.820173	1.21757	0.22751	0.263158	0.377356	0.230686
Dj-1	1.0519	1.23371	0.97468	1.41716	1.14314	1.62789	1.83147	1.17528	0.424843	0.455335	0.364755	0.396392
PGM	1.45801	0.942131	1.48864	1.36037	0.770571	1.05995	0.759962	1.38895	0.330793	0.451876	0.382624	0.237171
PFK	1.22434	1.25006	0.813379	1.50734	0.934327	1.63807	1.63807	1.02243	0.403321	0.384219	0.327598	0.205898
PYK	1.07923	1.36604	0.959264	1.40444	0.858565	1.45397	1.42405	1.22264	0.342458	0.504876	0.552482	0.487678
LDH	1.1607	1.03168	1.07549	1.39959	1.08298	0.982821	0.955945	1.19334	0.175799	0.625031	0.441964	0.323536
PHDX	0.774856	1.07326	0.595428	1.41617	0.813379	0.559419	0.713013	1.61552	0.189465	0.543367	0.510506	0.615572
	dsGFP	dsGFP	dsGFP	dsGFP	dsGFP	dsPHD	dsPHD	dsPHD	dsPHD	dsPHD	dsPHD+dsHif-1α2	dsPHD+dsHif-1α2	dsPHD+dsHif-1α2	dsPHD+dsHif-1α2	dsPHD+dsHif-1α2
miox	1.54542	0.632001	1.31768	0.706127	1.10038	1.09278	0.538867	0.456283	2.17046	0.805524	2.15846	0.812252	0.76313	0.550953	1.3566
gapdh	0.907519	0.602904	0.486328	0.316439	0.320856	1.28343	0.920188	0.493116	1.14076	1.50525	0.781328	0.430475	0.477641	0.511923	0.398873
GBE	0.726986	0.532185	0.316439	0.628507	0.441352	1.7411	0.752623	0.870551	0.594603	1.47427	0.588046	0.484309	0.455019	0.792235	0.354535
PGK	0.56331	0.521956	0.321302	0.540363	0.39832	0.83047	0.743291	1.16635	0.836246	1.66094	0.346878	0.285686	0.243586	0.364124	0.145844
PGI	0.679243	0.426909	0.341984	0.591315	0.438911	1.00835	0.890076	0.908778	0.791137	1.54971	0.606046	0.348082	0.357868	0.553824	0.327031
ENO	0.333094	0.26134	0.272438	0.280097	0.46458	1.45801	0.825878	1.01677	0.792235	1.03097	0.327598	0.251739	0.217638	0.291183	0.217638
Dj-1	0.546389	0.419866	0.425727	0.373195	0.686818	1.52415	0.984866	1.04102	0.900002	0.998615	0.78187	0.699793	0.639493	0.724471	0.424843
PGM	0.63905	0.461371	0.349654	0.647971	0.448755	0.948684	0.714002	1.1599	0.792235	1.60659	0.542427	0.42264	0.416821	0.499134	0.292701
PFK	0.471719	0.328964	0.431072	0.338212	0.601235	1.76052	0.700278	1.1376	0.681129	1.04681	0.792784	0.613443	0.49141	0.515842	0.276433
PYK	0.50698	0.371131	0.496546	0.381565	0.473029	1.61328	0.747425	1.1487	0.752623	0.959264	0.705882	0.506102	0.577343	0.589474	0.320301
LDH	0.231006	0.148239	0.342933	0.359983	0.209642	1.4103	1.67714	1.09885	0.710054	0.541863	0.2731	0.305131	0.367929	0.405423	0.21576
PHDX	0.460732	0.47698	0.34917	0.698339	0.511214	0.94737	0.769504	0.953959	0.953959	1.50734	0.271213	0.229649	0.193111	0.284697	0.129184
