# Supplementary material for: Non-canonical function of an Hif-1α splice variant contributes to the sustained flight of locusts
Source: eLife. 2022 Aug 30;11:e74554. doi: 10.7554/eLife.74554 (PMC9427102; doi:10.7554/eLife.74554)
Supplement: Figure 4—source data 1. [file elife-74554-fig4-data1.xlsx]

## Sheet: Sheet1
Figure 4A												Figure 4B
PYK activity						PFK activity							GeneID	PYK	LDH	PFK	PGK	PGM	PGI	PDHX	GAPDH	GBE1	ENO
dsGFP	dsHif-1α1	dsHif-1α2				dsGFP	dsHif-1α1	dsHif-1α2				rest	dsG	0.726986	0.840896	1.11535	0.771105	0.934651	0.808041	0.812252	0.796916	0.795536	1.12506
10.3989	5.63564	4.59346				3.88517	3.0721	0.23575				rest	dsG	0.933033	0.812252	0.799683	0.923382	0.947698	0.813661	0.888843	0.796916	0.870551	0.692555
9.82266	9.81828	5.87398				3.38175	1.43491	0.417528				rest	dsG	1.49485	0.993092	0.912249	1.25266	1.18304	1.18304	1.15669	1.2505	1.1487	1.23114
6.48798	7.73796	4.01192				2.91654	3.38548	0.76293				rest	dsG	0.986233	1.47427	1.22901	1.12117	0.95429	1.28565	1.19748	1.25919	1.25701	1.04247
10.569	9.1724	4.56742				3.2383	2.54347	0.962141				rest	dsP1	1.12506	1.51572	0.912249	1.09809	1.10382	1.05885	1.03526	1.33099	0.790041	0.795536
6.08583	13.1135	6.44965				2.59197	1.36153	0.161681				rest	dsP1	0.895025	0.864537	0.833642	0.734584	0.909093	1.0299	0.784584	0.708333	0.876606	0.888843
						1.67404	2.89233	0.316825				rest	dsP1	1.07177	1.46409	0.875088	1.03886	1.03706	1.0811	1.00696	1.19956	1.1487	0.641713
						3.18036	1.82049	1.80429				rest	dsP1	0.876606	1.14076	0.610262	0.809442	0.909093	0.738413	0.496546	0.813661	0.678302	0.726986
												rest	dsp2	0.327598	0.316439	0.1375	0.276433	0.287673	0.130534	0.260616	0.114427	0.219151	0.132127
Table Analyzed	Data 2		Table Analyzed	Data 2		Table Analyzed	Data 2		Table Analyzed	Data 2		rest	dsp2	0.607097	0.473029	0.256583	0.25437	0.625248	0.199229	0.562529	0.24528	0.397768	0.210224
Column A			Column A			Column A			Column A			rest	dsp2	0.517632	0.435275	0.195806	0.537747	0.54055	0.172241	0.469761	0.146859	0.243164	0.198884
vs	vs		vs	vs		vs	vs		vs	vs		rest	dsp2	0.594604	0.366021	0.37566	0.302499	0.759173	0.364124	0.668964	0.511391	0.590496	0.397768
Column B			Column C			Column B			Column C			flight	dsG	1.65864	0.993092	1.03347	1.41912	0.902814	1.06622	1.94531	1.12701	1.42405	1.65864
												flight	dsG	1.17283	0.586417	1.01924	1.50004	0.974342	0.967612	1.23114	1.49744	1.33793	1.87905
Unpaired t test			Unpaired t test			Unpaired t test			Unpaired t test			flight	dsG	1.76541	1.29235	1.44143	0.982821	0.947698	1.0811	1.55833	1.84357	1.7411	1.50525
P value	0.7957		P value	0.0109		P value	0.1523		P value	< 0.0001		flight	dsG	1.8025	0.812252	1.79938	1.95206	1.68471	1.56103	1.31039	1.73207	1.91853	1.09429
P value summary	ns		P value summary	*		P value summary	ns		P value summary	***		flight	dsP1	2.42839	0.646176	1.69056	2.30537	2.0174	1.60492	1.1487	1.84357	1.87905	1.00696
Are means signif. different? (P < 0.05)	No		Are means signif. different? (P < 0.05)	Yes		Are means signif. different? (P < 0.05)	No		Are means signif. different? (P < 0.05)	Yes		flight	dsP1	1.1487	0.510506	1.19541	1.38032	0.836536	0.878126	1.25701	1.05885	1.02101	1.06437
One- or two-tailed P value?	Two-tailed		One- or two-tailed P value?	Two-tailed		One- or two-tailed P value?	Two-tailed		One- or two-tailed P value?	Two-tailed		flight	dsP1	2.60268	0.687771	1.8245	2.06337	1.56103	1.60492	1.1487	1.8693	1.71713	1.01396
t, df	t=0.2677 df=8		t, df	t=3.296 df=8		t, df	t=1.528 df=12		t, df	t=6.735 df=12		flight	dsP1	1.49485	1.01396	1.22052	1.39959	1.0299	1.38751	1.40444	1.11149	2.32947	1.7411
												flight	dsp2	0.496546	0.301452	0.197168	0.25437	0.473849	0.183328	0.429283	0.241903	0.323088	0.149685
												flight	dsp2	0.463294	0.732043	0.288671	0.319746	0.504351	0.200615	0.590496	0.191113	0.400535	0.19751
												flight	dsp2	0.779165	0.68302	0.357868	0.32421	0.743549	0.275954	0.578344	0.268408	0.378929	0.248273
												flight	dsp2	0.554785	0.598739	0.577343	0.694959	0.633976	0.287673	0.870551	0.665495	0.687771	0.521233
Figure 4C
Trehalose content								Glucose content								Pyruvate content
rest	rest	rest	flight	flight	flight			rest	rest	rest	flight	flight	flight			rest	rest	rest	flight	flight	flight
dsGFP	dsHif-1α1	dsHif-1α2	dsGFP	dsHif-1α1	dsHif-1α2			dsGFP	dsHif-1α1	dsHif-1α2	dsGFP	dsHif-1α1	dsHif-1α2			dsGFP	dsHif-1α1	dsHif-1α2	dsGFP	dsHif-1α1	dsHif-1α2
15.0074	7.53453	9.52912	5.7275	4.72911	4.38629			7.40225	6.40022	4.28422	3.03461	2.50971	5.86042			4.761	6.21114	8.45121	5.12139	6.47105	1.31042
12.1368	8.97617	7.86932	3.20712	4.26325	5.13675			8.32504	5.56128	5.65735	2.50845	2.52668	4.77426			8.14942	6.9501	6.7064	3.61047	6.81423	2.86145
10.9898	8.88932	9.70407	4.8746	5.15686	3.83609			5.94301	7.35749	4.9486	2.53728	3.13669	6.71497			6.04884	8.06701	5.30769	5.81041	4.36276	1.51994
7.52454	13.8959	7.65515	6.71506	5.00423	5.87652			5.29871	6.10083	8.35619	2.48231	4.4691	4.21763			6.76576	6.04175	3.89816	4.28752	2.49644	2.48304
7.75504	13.0954	8.30334	6.09058	5.00346	5.70732			6.42909	6.81071	6.65745	3.98493	4.14043	4.7606			6.63608	8.30659	4.59569	4.6611	4.23993	3.00983
Bonferroni's Multiple Comparison Test	Mean Diff.	t	Significant? P < 0.05?	Summary	95% CI of diff			Bonferroni's Multiple Comparison Test	Mean Diff.	t	Significant? P < 0.05?	Summary	95% CI of diff			Bonferroni's Multiple Comparison Test	Mean Diff.	t	Significant? P < 0.05?	Summary	95% CI of diff
Column A vs Column B	0.2044	0.1709	No	ns	-3.695 to 4.104			Column A vs Column B	0.2335	0.4944	No	ns	-1.832 to 2.299			Column A vs Column B	-0.6431	1.096	No	ns	-3.210 to 1.923
Column A vs Column C	2.071	1.73	No	ns	-1.829 to 5.970			Column A vs Column C	0.6989	1.48	No	ns	-1.367 to 2.764			Column A vs Column C	0.6804	1.159	No	ns	-1.886 to 3.247
Column A vs Column D	5.36	4.479	Yes	**	1.461 to 9.259			Column A vs Column D	3.77	7.982	Yes	***	1.705 to 5.835			Column A vs Column D	1.774	3.023	No	ns	-0.7925 to 4.341
Column A vs Column E	5.851	4.89	Yes	***	1.952 to 9.750			Column A vs Column E	3.323	7.036	Yes	***	1.258 to 5.388			Column A vs Column E	1.595	2.718	No	ns	-0.9713 to 4.162
Column A vs Column F	5.694	4.758	Yes	**	1.795 to 9.593			Column A vs Column F	1.414	2.994	No	ns	-0.6513 to 3.479			Column A vs Column F	4.235	7.216	Yes	***	1.669 to 6.802
Column B vs Column C	1.866	1.559	No	ns	-2.033 to 5.765			Column B vs Column C	0.4653	0.9853	No	ns	-1.600 to 2.531			Column B vs Column C	1.323	2.255	No	ns	-1.243 to 3.890
Column B vs Column D	5.155	4.308	Yes	**	1.256 to 9.054			Column B vs Column D	3.537	7.488	Yes	***	1.471 to 5.602			Column B vs Column D	2.417	4.118	No	ns	-0.1494 to 4.984
Column B vs Column E	5.647	4.719	Yes	**	1.748 to 9.546			Column B vs Column E	3.09	6.542	Yes	**	1.024 to 5.155			Column B vs Column E	2.238	3.814	No	ns	-0.3282 to 4.805
Column B vs Column F	5.49	4.588	Yes	**	1.591 to 9.389			Column B vs Column F	1.181	2.5	No	ns	-0.8848 to 3.246			Column B vs Column F	4.878	8.312	Yes	***	2.312 to 7.445
Column C vs Column D	3.289	2.749	No	ns	-0.6099 to 7.188			Column C vs Column D	3.071	6.503	Yes	**	1.006 to 5.137			Column C vs Column D	1.094	1.863	No	ns	-1.473 to 3.660
Column C vs Column E	3.781	3.16	No	ns	-0.1183 to 7.680			Column C vs Column E	2.624	5.556	Yes	**	0.5589 to 4.690			Column C vs Column E	0.9149	1.559	No	ns	-1.652 to 3.482
Column C vs Column F	3.624	3.028	No	ns	-0.2755 to 7.523			Column C vs Column F	0.7152	1.514	No	ns	-1.350 to 2.781			Column C vs Column F	3.555	6.057	Yes	**	0.9883 to 6.121
Column D vs Column E	0.4916	0.4108	No	ns	-3.407 to 4.391			Column D vs Column E	-0.447	0.9464	No	ns	-2.512 to 1.618			Column D vs Column E	-0.1787	0.3045	No	ns	-2.745 to 2.388
Column D vs Column F	0.3344	0.2794	No	ns	-3.565 to 4.233			Column D vs Column F	-2.356	4.988	Yes	*	-4.421 to -0.2907			Column D vs Column F	2.461	2.965	Yes	*	0.3251 to 4.597
Column E vs Column F	-0.1572	0.1314	No	ns	-4.056 to 3.742			Column E vs Column F	-1.909	4.042	No	ns	-3.974 to 0.1563			Column E vs Column F	2.64	4.498	Yes	*	0.07336 to 5.207
Figure 4D
60 min									120 min									180 min
flight distance			flight duration			flight speed			flight distance			flight duration			flight speed			flight distance			flight duration			flight speed
dsGFP	dsPYK		dsGFP	dsPYK		dsGFP	dsPYK		dsGFP+P9J68:Q96	dsPYK		dsGFP	dsPYK		dsGFP	dsPYK		dsGFP+P9J68:Q96	dsPYK		dsGFP	dsPYK		dsGFP	dsPYK
1.21919	0.16663		0.3789	0.05387		3.1998	2.99521		1.51098	0.46143		0.49281	0.14517		3.03698	3.10069		2.07043	0.815055		0.69535	0.24841		2.95369	3.22038
1.94979	1.58035		0.44372	0.43608		4.36872	3.54964		7.61145	1.75602		1.46317	0.53101		5.1943	3.15786		10.938	2.26949		2.16967	0.67669		5.03542	3.16327
0.830134	1.16943		0.24789	0.4043		3.0416	2.81228		1.78845	1.563		0.44823	0.5691		3.65527	2.60999		2.17223	1.84424		0.56093	0.68143		3.45854	2.53714
1.32625	0.50743		0.31232	0.14634		4.17404	3.44686		2.71057	0.695926		0.74944	0.21043		3.50512	3.24266		3.16522	0.7276		0.88826	0.22116		3.40551	3.22171
3.32582	0.8226		0.86211	0.26365		3.85514	3.0971		7.2797	1.15133		1.84653	0.38348		3.94033	2.9728		10.9275	1.1672		2.70711	0.3904		4.03435	2.9571
0.939462	1.0216		0.28108	0.32509		3.00434	2.9803		2.09155	1.5796		0.59902	0.53019		3.19079	2.7873		2.59219	2.1579		0.7713	0.7231		3.01867	2.7989
0.43354	0.8935		0.13304	0.22911		2.86767	3.7747		0.591876	1.49515		0.17853	0.45959		2.8296	3.094		0.717037	1.6143		0.20678	0.5068		2.88422	2.9887
4.67167	4.9679		1.00996	1.00724		4.6256	4.2562		7.09171	9.948		1.5863	2.01736		4.4706	4.4864		9.04761	13.4375		2.02212	3.0008		4.47432	4.4667
0.589614	5.7265		0.1211	1.0701		4.77503	5.3499		0.665012	10.5625		0.14711	2.08192		4.36675	5.0727		0.695172	14.3626		0.15887	3.01197		4.20013	4.768
0.472747	0.7291		0.16403	0.2482		2.29371	2.6582		0.894233	1.0126		0.29854	0.32713		2.33362	2.6298		1.38431	2.5278		0.43922	0.37822		2.55436	2.5278
1.50118	4.787		0.36296	1.0612		4.03415	4.5108		2.65402	9.1036		0.67053	2.0979		3.84227	4.3917		3.79404	12.9097		0.92849	3.00311		3.98639	4.2988
1.64293	0.5753		0.41805	0.1096		3.80192	5.1778		1.97016	2.4331		0.52768	0.54758		3.56358	4.4007		2.03801	4.2921		0.55054	0.61414		3.51559	4.2921
1.64368	1.1385		0.52071	0.41288		3.06105	2.6169		2.37957	1.90456		0.72832	0.69075		3.12537	2.6055		2.48889	2.4987		0.76047	0.89715		3.12412	2.6364
1.04351	1.7206		0.29711	0.43765		3.26858	3.847		2.10512	3.0332		0.59641	0.76456		3.27049	3.8737		2.40973	5.6775		0.70655	1.33728		3.12883	4.1745
2.26949	1.1438		0.86433	0.28179		2.67087	3.9788		2.55223	1.2667		0.93079	0.32342		2.69259	3.7837		3.05363	1.2984		1.09228	0.33116		2.7418	3.7271
2.4791	1.3044		0.77793	0.49769		3.18678	2.5936		4.23436	1.4522		1.40295	0.5394		3.01819	2.6628		5.3676	2.7211		1.83117	0.9954		2.93124	2.7095
1.64293	2.6058		0.41805	0.6748		3.80192	3.8526		1.97016	0.9342		0.52768	0.2745		3.56358	3.3867		2.03801	1.4786		0.55054	0.4304		3.51559	3.3929
1.23427	2.2378		0.31803	0.5559		3.68421	3.9599		1.8842	1.9928		0.51846	0.535		3.3681	3.5768		2.982	2.3389		0.80055	0.6764		3.48666	3.2738
4.22984	1.0186		1.03368	0.2812		4.09202	3.5149		8.53433	0.92514		1.93877	0.2238		4.3998	3.9144		12.915	1.0066		2.81152	0.2525		4.59225	3.7147
1.21919	1.4122		0.3789	0.3663		3.1998	3.8141		1.51098	0.6499		0.49281	0.2319		3.03698	2.6406		2.07043	0.7095		0.69535	0.2507		2.95369	2.6585
1.23427			0.31803			3.68421			1.8842	5.23867		0.51846	1.3128		3.3681	3.9847		2.982	8.2923		0.80055	2.2496		3.48666	3.6828
0.383777			0.11462			2.59177			1.19054	2.7513		0.33457	0.7528		3.12122	3.5458		1.37376	3.3741		0.38022	0.9597		3.01617	3.3894
										1.3986			0.4435			3.0001			1.4032			0.4435			3.0001
										1.6316			0.4338			3.7106			1.6316			0.4338			3.7106
Parameter			Parameter			Parameter			Parameter			Parameter			Parameter			Parameter			Parameter			Parameter
Table Analyzed	Data 1		Table Analyzed	Data 1		Table Analyzed	Data 1		Table Analyzed	Data 1		Table Analyzed	Data 1		Table Analyzed	Data 1		Table Analyzed	Data 1		Table Analyzed	Data 1		Table Analyzed	Data 1
Column A			Column A			Column A			Column A			Column A			Column A			Column A			Column A			Column A
vs	vs		vs	vs		vs	vs		vs	vs		vs	vs		vs	vs		vs	vs		vs	vs		vs	vs
Column B			Column B			Column B			Column B			Column B			Column B			Column B			Column B			Column B
Unpaired t test			Unpaired t test			Unpaired t test			Unpaired t test			Unpaired t test			Unpaired t test			Unpaired t test			Unpaired t test			Unpaired t test
P value	0.7646		P value	0.9891		P value	0.5774		P value	0.7515		P value	0.5952		P value	0.796		P value	0.8681		P value	0.7569		P value	0.6456
P value summary	ns		P value summary	ns		P value summary	ns		P value summary	ns		P value summary	ns		P value summary	ns		P value summary	ns		P value summary	ns		P value summary	ns
Are means signif. different? (P < 0.05)	No		Are means signif. different? (P < 0.05)	No		Are means signif. different? (P < 0.05)	No		Are means signif. different? (P < 0.05)	No		Are means signif. different? (P < 0.05)	No		Are means signif. different? (P < 0.05)	No		Are means signif. different? (P < 0.05)	No		Are means signif. different? (P < 0.05)	No		Are means signif. different? (P < 0.05)	No
One- or two-tailed P value?	Two-tailed		One- or two-tailed P value?	Two-tailed		One- or two-tailed P value?	Two-tailed		One- or two-tailed P value?	Two-tailed		One- or two-tailed P value?	Two-tailed		One- or two-tailed P value?	Two-tailed		One- or two-tailed P value?	Two-tailed		One- or two-tailed P value?	Two-tailed		One- or two-tailed P value?	Two-tailed
t, df	t=0.3015 df=40		t, df	t=0.01380 df=40		t, df	t=0.5618 df=40		t, df	t=0.3186 df=44		t, df	t=0.5352 df=44		t, df	t=0.2602 df=44		t, df	t=0.1670 df=44		t, df	t=0.3115 df=44		t, df	t=0.4631 df=44
How big is the difference?			How big is the difference?			How big is the difference?			How big is the difference?			How big is the difference?			How big is the difference?			How big is the difference?			How big is the difference?			How big is the difference?
Mean ± SEM of column A	1.649 ?0.2450 N=22		Mean ± SEM of column A	0.4444 ?0.06024 N=22		Mean ± SEM of column A	3.513 ?0.1431 N=22		Mean ± SEM of column A	2.959 ?0.5103 N=22		Mean ± SEM of column A	0.7726 ?0.1122 N=22		Mean ± SEM of column A	3.495 ?0.1419 N=22		Mean ± SEM of column A	3.965 ?0.7607 N=22		Mean ± SEM of column A	1.024 ?0.1639 N=22		Mean ± SEM of column A	3.477 ?0.1398 N=22
Mean ± SEM of column B	1.776 ?0.3513 N=20		Mean ± SEM of column B	0.4431 ?0.06697 N=20		Mean ± SEM of column B	3.639 ?0.1761 N=20		Mean ± SEM of column B	2.706 ?0.6007 N=24		Mean ± SEM of column B	0.6845 ?0.1195 N=24		Mean ± SEM of column B	3.443 ?0.1412 N=24		Mean ± SEM of column B	3.773 ?0.8476 N=24		Mean ± SEM of column B	0.9464 ?0.1851 N=24		Mean ± SEM of column B	3.388 ?0.1328 N=24
Difference between means	-0.1273 ?0.4220		Difference between means	0.001239 ?0.08982		Difference between means	-0.1265 ?0.2251		Difference between means	0.2535 ?0.7954		Difference between means	0.08813 ?0.1647		Difference between means	0.05216 ?0.2005		Difference between means	0.1915 ?1.147		Difference between means	0.07758 ?0.2490		Difference between means	0.08924 ?0.1927
95% confidence interval	-0.9802 to 0.7257		95% confidence interval	-0.1803 to 0.1828		95% confidence interval	-0.5814 to 0.3285		95% confidence interval	-1.351 to 1.858		95% confidence interval	-0.2440 to 0.4203		95% confidence interval	-0.3522 to 0.4566		95% confidence interval	-2.121 to 2.504		95% confidence interval	-0.4247 to 0.5798		95% confidence interval	-0.2994 to 0.4779
R squared	0.002268		R squared	4.758e-06		R squared	0.00783		R squared	0.002302		R squared	0.006467		R squared	0.001536		R squared	0.0006337		R squared	0.002201		R squared	0.00485
