# Supplementary material for: Non-canonical function of an Hif-1α splice variant contributes to the sustained flight of locusts
Source: eLife. 2022 Aug 30;11:e74554. doi: 10.7554/eLife.74554 (PMC9427102; doi:10.7554/eLife.74554)
Supplement: Figure 5—source data 1. [file elife-74554-fig5-data1.xlsx]

## Sheet: Sheet1
Figure 5A								Figure 5B
DHE intensity								H2O2 level								GSH/GSSG								Hif-1α2
rest	rest	rest	flight	flight	flight			rest	rest	rest	flight	flight	flight			rest	rest	rest	flight	flight	flight
dsGFP	dsHif-1α1	dsHif-1α2	dsGFP	dsHif-1α1	dsHif-1α2			dsGFP	dsHif-1α1	dsHif-1α2	dsGFP	dsHif-1α1	dsHif-1α2			dsGFP	dsHif-1α1	dsHif-1α2	dsGFP	dsHif-1α1	dsHif-1α2
2.87	4.507	4.7	3.557	1.014	7.567			0.361317	0.154606	0.368469	0.241984	0.315345	0.474928			10.2513	9.46701	11.5214	11.0063	10.9557	4.2226
5.243	3.684	3.408	1.32	4.333	6.366			0.223028	0.395837	0.182991	0.302602	0.420625	0.513081			8.75952	13.0928	12.7342	11.5239	13.4269	6.57249
3.155	3.343	2.556	3.375	1.592	2.847			0.29122	0.449487	0.373888	0.163947	0.189782	0.617312			18.1942	7.9828	9.20035	8.52081	8.45809	4.74031
1.476	1.272	1.962	2.578	5.246	7.058			0.309227	0.328068	0.4975	0.209475	0.399604	0.731855			9.64046	11.7948	8.353	10.0314	14.1882	6.06935
2.086	3.048	2.526	3.563	7.011	8.678			0.32018	0.236642	0.527486	0.480759	0.345908	0.4175			12.0002	14.7398	14.7447	15.0142	15.8501	4.67931
			5.009	3.527	9.751											9.22739	10.4904	11.3399	9.59099	8.16422	8.66748
			7.316	7.495	10.323
			2.558	4.164	3.737
				1.232
Bonferroni's Multiple Comparison Test	Mean Diff.	t	Significant? P < 0.05?	Summary	95% CI of diff			Bonferroni's Multiple Comparison Test	Mean Diff.	t	Significant? P < 0.05?	Summary	95% CI of diff			Bonferroni's Multiple Comparison Test	Mean Diff.	t	Significant? P < 0.05?	Summary	95% CI of diff
Column A vs Column B	-0.2048	0.1612	No	ns	-4.216 to 3.806			Column A vs Column B	-0.01193	0.1697	No	ns	-0.2411 to 0.2173			Column A vs Column B	0.08422	0.05527	No	ns	-4.775 to 4.944
Column A vs Column C	-0.0644	0.05069	No	ns	-4.075 to 3.947			Column A vs Column C	-0.08907	1.266	No	ns	-0.3183 to 0.1401			Column A vs Column C	0.0299	0.01962	No	ns	-4.830 to 4.890
Column A vs Column D	-0.6935	0.6055	No	ns	-4.309 to 2.922			Column A vs Column D	0.02124	0.302	No	ns	-0.2080 to 0.2504			Column A vs Column D	0.3976	0.2609	No	ns	-4.462 to 5.257
Column A vs Column E	-0.9911	0.8845	No	ns	-4.528 to 2.546			Column A vs Column E	-0.03326	0.4728	No	ns	-0.2625 to 0.1959			Column A vs Column E	-0.495	0.3248	No	ns	-5.355 to 4.365
Column A vs Column F	-4.075	3.558	Yes	*	-7.690 to -0.4594			Column A vs Column F	-0.2499	3.553	Yes	*	-0.4791 to -0.02074			Column A vs Column F	5.52	3.622	Yes	*	0.6606 to 10.38
Column B vs Column C	0.1404	0.1105	No	ns	-3.871 to 4.151			Column B vs Column C	-0.07714	1.097	No	ns	-0.3063 to 0.1521			Column B vs Column C	-0.05433	0.03565	No	ns	-4.914 to 4.805
Column B vs Column D	-0.4887	0.4267	No	ns	-4.104 to 3.127			Column B vs Column D	0.03317	0.4716	No	ns	-0.1960 to 0.2624			Column B vs Column D	0.3133	0.2056	No	ns	-4.546 to 5.173
Column B vs Column E	-0.7863	0.7017	No	ns	-4.324 to 2.751			Column B vs Column E	-0.02132	0.3032	No	ns	-0.2505 to 0.2079			Column B vs Column E	-0.5793	0.3801	No	ns	-5.439 to 4.280
Column B vs Column F	-3.87	3.379	Yes	*	-7.486 to -0.2546			Column B vs Column F	-0.238	3.384	Yes	*	-0.4672 to -0.008808			Column B vs Column F	5.436	3.567	Yes	*	0.5764 to 10.30
Column C vs Column D	-0.6291	0.5493	No	ns	-4.245 to 2.986			Column C vs Column D	0.1103	1.568	No	ns	-0.1189 to 0.3395			Column C vs Column D	0.3677	0.2413	No	ns	-4.492 to 5.227
Column C vs Column E	-0.9267	0.827	No	ns	-4.464 to 2.611			Column C vs Column E	0.05581	0.7935	No	ns	-0.1734 to 0.2850			Column C vs Column E	-0.5249	0.3445	No	ns	-5.385 to 4.335
Column C vs Column F	-4.01	3.502	Yes	*	-7.626 to -0.3950			Column C vs Column F	-0.1609	2.287	No	ns	-0.3901 to 0.06833			Column C vs Column F	5.49	3.603	Yes	*	0.6307 to 10.35
Column D vs Column E	-0.2976	0.3049	No	ns	-3.379 to 2.784			Column D vs Column E	-0.0545	0.7748	No	ns	-0.2837 to 0.1747			Column D vs Column E	-0.8926	0.5857	No	ns	-5.752 to 3.967
Column D vs Column F	-3.381	3.366	Yes	*	-6.552 to -0.2104			Column D vs Column F	-0.2712	3.855	Yes	**	-0.5004 to -0.04198			Column D vs Column F	5.123	3.361	Yes	*	0.2631 to 9.982
Column E vs Column F	-3.084	3.159	Yes	*	-6.165 to -0.002123			Column E vs Column F	-0.2167	3.08	No	ns	-0.4459 to 0.01252			Column E vs Column F	6.015	3.947	Yes	**	1.156 to 10.87
