# Supplementary material for: Non-canonical function of an Hif-1α splice variant contributes to the sustained flight of locusts
Source: eLife. 2022 Aug 30;11:e74554. doi: 10.7554/eLife.74554 (PMC9427102; doi:10.7554/eLife.74554)
Supplement: Figure 6—figure supplement 1—source data 1. [file elife-74554-fig6-figsupp1-data1.xlsx]

## Sheet: Sheet1
Figure 6-figure supplement 1D
Dj-1 tissue distribution
Flight muscle	Fat body	Midgut	Testis	Brain
65.7993	15.6707	12.7286	17.6305	16.4498
50.9143	9.12611	16.3362	15.1369	27.0958
44.6318	17.2676	11.7942	15.0324	33.1285
66.7178	16.4498	13.2691	16.1113	16.3362
46.5271	16.6794	17.2676	15.455	25.6342
Bonferroni's Multiple Comparison Test	Mean Diff.	t	Significant? P < 0.05?	Summary	95% CI of diff
Column A vs Column B	39.88	10.41	Yes	***	27.80 to 51.95
Column A vs Column C	40.64	10.61	Yes	***	28.56 to 52.71
Column A vs Column D	39.04	10.2	Yes	***	26.97 to 51.12
Column A vs Column E	31.19	8.145	Yes	***	19.11 to 43.26
Column B vs Column C	0.7596	0.1984	No	ns	-11.32 to 12.83
Column B vs Column D	-0.8345	0.2179	No	ns	-12.91 to 11.24
Column B vs Column E	-8.69	2.269	No	ns	-20.77 to 3.385
Column C vs Column D	-1.594	0.4163	No	ns	-13.67 to 10.48
Column C vs Column E	-9.45	2.468	No	ns	-21.53 to 2.626
Column D vs Column E	-7.856	2.051	No	ns	-19.93 to 4.220
Dj-1 developmental stage
4th	5th	1st	6th	12th
0.183011	0.570382	0.742262	0.913831	0.835088
0.287175	0.441351	0.287175	0.752623	0.858565
0.264255	0.558644	0.547147	0.566442	1.00696
0.214641	0.307786	0.615572	0.646176	1.07923
Bonferroni's Multiple Comparison Test	Mean Diff.	t	Significant? P < 0.05?	Summary	95% CI of diff
Column A vs Column B	-0.2323	2.443	No	ns	-0.5447 to 0.08013
Column A vs Column C	-0.3108	3.269	No	ns	-0.6232 to 0.001635
Column A vs Column D	-0.4825	5.075	Yes	**	-0.7949 to -0.1701
Column A vs Column E	-0.7077	7.444	Yes	***	-1.020 to -0.3953
Column B vs Column C	-0.0785	0.8257	No	ns	-0.3909 to 0.2339
Column B vs Column D	-0.2502	2.632	No	ns	-0.5626 to 0.06218
Column B vs Column E	-0.4754	5.001	Yes	**	-0.7878 to -0.1630
Column C vs Column D	-0.1717	1.806	No	ns	-0.4841 to 0.1407
Column C vs Column E	-0.3969	4.175	Yes	**	-0.7093 to -0.08452
Column D vs Column E	-0.2252	2.369	No	ns	-0.5376 to 0.08721
