# Supplementary material for: Non-canonical function of an Hif-1α splice variant contributes to the sustained flight of locusts
Source: eLife. 2022 Aug 30;11:e74554. doi: 10.7554/eLife.74554 (PMC9427102; doi:10.7554/eLife.74554)
Supplement: Figure 6—source data 1. — Raw data for H2O2 content, reduced to oxidized glutathione (GSH/GSSG) level, and flight performance test in the absence of Dj-1. [file elife-74554-fig6-data1.xlsx]

## Sheet: Sheet1
Figure 6A									Figure 6B							Figure 6D
rest	rest	rest	fligth	fligth	fligth											dsGFP	dsDj-1		GSH/GSSG							H2O2 content
dsGFP	dsHif-1α1	dsHif-1α2	dsGFP	dsHif-1α1	dsHif-1α2				pcDNA	Hif-1α1	Hif-1α2	pcDNA	Hif-1α1	Hif-1α2		128.89	2.94854		rest	rest	flight	flight				rest	rest	flight	flight
0.936272	1.16878	0.298334	1.12896	1.95206	0.317538				0.971754	0.935887	0.977647	1.01602	1.45076	3.19014		122.786	3.13834		dsGFP	dsDj-1	dsGFP	dsDj-1				dsGFP	dsDj-1	dsGFP	dsDj-1
1.11342	1.08298	0.50874	1.64148	1.26138	0.643941				0.967143	0.949978	1.03683	0.981961	1.44269	3.1637		142.025	3.4822		11.2901	7.65842	7.8751	2.96874				0.661156	0.621025	0.667233	0.843355
1.27015	1.28788	0.530344	1.48968	1.61888	0.427798				1.06168	0.991738	0.929738	0.99451	1.40101	3.2251		109.896	3.05252		10.7354	8.21763	8.43843	3.18779				0.523915	0.578054	0.768569	0.884672
0.755236	0.936272	0.501736	2.06337	1.30586	0.690159				0.999424	0.940754	0.923333	1.00751	1.20112	2.8921		230.72	3.01049		9.1905	9.70287	12.7949	4.16461				0.844032	0.695979	0.549934	0.939717
																			8.56241	5.12953	10.5705	3.30776				0.551951	0.488655	0.590437	0.754337
Bonferroni's multiple comparisons test	Mean Diff.	Below threshold?	Summary	Adjusted P Value	95.00% CI of diff.				Column D							Column A			7.3548	7.11725	4.94698	4.64333				0.465807	0.422743	0.708754	1.16076
Column A vs. Column B	-0.1002	No	ns	>0.9999	-0.6306 to 0.4302				vs							vs	vs
Column A vs. Column C	0.559	Yes	*	0.035	0.02859 to 1.089				Column F							Column B			Bonferroni's Multiple Comparison Test	Mean Diff.	t	Significant? P < 0.05?	Summary	95% CI of diff		Bonferroni's Multiple Comparison Test	Mean Diff.	t	Significant? P < 0.05?	Summary	95% CI of diff
Column A vs. Column D	-0.5621	Yes	*	0.0336	-1.092 to -0.03171														Column A vs Column B	1.862	1.542	No	ns	-1.771 to 5.494		Column A vs Column B	0.04808	0.597	No	ns	-0.1942 to 0.2903
Column A vs. Column E	-0.5158	No	ns	0.06	-1.046 to 0.01462				Unpaired t test							Unpaired t test			Column A vs Column C	0.5015	0.4153	No	ns	-3.131 to 4.134		Column A vs Column C	-0.04761	0.5912	No	ns	-0.2899 to 0.1946
Column A vs. Column F	0.4989	No	ns	0.0739	-0.03148 to 1.029				P value	< 0.0001						P value	0.0002		Column A vs Column D	5.772	4.781	Yes	**	2.140 to 9.404		Column A vs Column D	-0.3072	3.815	Yes	**	-0.5495 to -0.06493
Column D vs. Column E	0.04633	No	ns	>0.9999	-0.4841 to 0.5767				P value summary	***						P value summary	***		Column B vs Column C	-1.36	1.126	No	ns	-4.992 to 2.272		Column B vs Column C	-0.09569	1.188	No	ns	-0.3380 to 0.1466
Column D vs. Column F	1.061	Yes	****	<0.0001	0.5306 to 1.591				Are means signif. different? (P < 0.05)	Yes						Are means signif. different? (P < 0.05)	Yes		Column B vs Column D	3.911	3.239	Yes	*	0.2785 to 7.543		Column B vs Column D	-0.3553	4.412	Yes	**	-0.5975 to -0.1130
									One- or two-tailed P value?	Two-tailed						One- or two-tailed P value?	Two-tailed		Column C vs Column D	5.271	4.365	Yes	**	1.639 to 8.903		Column C vs Column D	-0.2596	3.223	Yes	*	-0.5018 to -0.01732
									t, df	t=27.64 df=6						t, df	t=6.657 df=8
Figure 6E
60 min									120 min									180 min
flight distance(Km)			flight duration(h)			flight speed(km/h)			flight distance(Km)			flight duration(h)			flight speed(km/h)			flight distance(Km)			flight duration(h)			flight speed(km/h)
dsGFP	dsDJ-1		dsGFP	dsDJ-1		dsGFP	dsDJ-1		dsGFP	dsDJ-1		dsGFP	dsDJ-1		dsGFP	dsDJ-1		dsGFP	dsDJ-1		dsGFP	dsDJ-1		dsGFP	dsDJ-1
1.11212	0.539097		0.33602	0.1532		3.09204	3.22341		2.85156	0.760014		0.8027	0.22934		3.39654	2.93584		3.15542	0.989979		0.91109	0.31467		3.28707	2.73635
1.02466	0.430524		0.41267	0.14697		2.09018	2.78569		2.06591	0.478779		0.79508	0.16342		2.26267	2.73135		3.90035	0.57755		1.35991	0.20204		2.62691	2.59363
3.58971	0.395087		1.01173	0.1215		3.5466	2.20299		7.01	0.601678		1.84087	0.17178		3.80376	2.16828		10.8445	0.7597		2.83882	0.19162		3.81769	2.16019
1.89853	0.283497		0.5358	0.13314		3.48143	1.68193		2.25215	0.383023		0.6631	0.1778		3.27245	1.65808		2.5364	0.516478		0.76953	0.23778		3.13633	1.62985
4.19063	0.419968		1.01854	0.17159		4.11435	2.26735		7.4712	0.868588		1.88073	0.37114		3.9713	2.1006		9.2491	1.06764		2.2749	0.45532		4.06373	2.09642
1.09758	2.76862		0.41539	0.95713		4.91879	2.89027		3.50526	5.08561		0.78372	1.70919		4.32444	2.9728		6.8733	6.49054		1.48667	2.25255		4.52693	2.88142
0.646163	0.17417		0.15213	0.04361		4.04424	2.87001		0.782643	0.276711		0.1926	0.07769		3.81689	2.76593		0.814301	0.35588		0.19904	0.10335		3.83033	2.76497
1.01184	1.69269		0.34277	0.41676		2.56702	4.04526		1.77638	2.00182		0.58065	0.49504		2.71909	4.00416		2.66156	2.26345		0.85201	0.55766		2.82652	4.01017
0.146273	0.635607		0.05158	0.16587		2.22189	3.75468		0.698942	3.3784		0.22388	0.67472		2.8963	4.95488		2.90434	4.81191		0.97044	0.97334		2.89413	4.88329
4.46056	0.278973		1.01066	0.10357		4.41351	2.36598		7.59498	0.309887		1.78942	0.11693		4.24438	2.30844		10.1428	0.404888		2.45283	0.15458		4.13515	2.22907
4.23663	0.190004		1.03936	0.06082		4.07619	2.71493		8.73413	0.246552		2.00101	0.07922		4.36486	2.63637		13.2942	0.369451		3.02049	0.11866		4.40134	2.64968
0.257108	0.125161		0.07044	0.04627		3.55369	2.24875		0.639651	0.207345		0.18549	0.078		3.44844	2.19428		0.781126	0.27068		0.24701	0.10291		2.97613	2.16868
1.47479	1.55019		0.43569	0.43549		3.30015	3.29994		2.44667	2.56477		0.68672	0.77121		3.48928	3.14025		4.08357	4.59854		0.99904	1.25906		4.0324	3.40803
1.07744	2.99769		0.38053	0.57812		2.6848	5.18525		1.63237	3.40552		0.6002	0.68047		2.50239	5.00466		2.03877	4.19408		0.75313	0.86347		2.13075	4.85724
0.395841	4.08583		0.13425	1.09047		2.65087	4.74685		0.888945	8.07741		0.28508	2.02471		2.78498	3.98904		1.50193	12.3932		0.46452	3.00308		2.91679	4.12658
1.02617	0.790173		0.32479	0.2366		3.04574	3.21861		1.27272	0.949264		0.4066	0.28928		2.99108	3.13812		1.373	0.949264		0.44288	0.28928		2.95546	3.13812
0.673306	1.04954		0.25795	0.45635		2.10454	2.0669		1.15359	2.07194		0.43291	0.91795		2.13702	1.93516		1.68138	2.46628		0.6259	1.08885		2.19003	1.92711
5.07204	0.646917		1.00738	0.21189		5.03488	2.54067		9.81308	1.05934		2.01902	0.33756		4.86032	2.41678		14.2782	1.12117		3.01248	0.35118		4.73967	2.36814
1.48158	1.69196		0.43211	0.50634		3.34494	3.28343		1.97622	2.09833		0.57747	0.61779		3.33989	3.31352		2.84414	2.84402		0.74852	0.82407		3.21529	3.36884
0.957557	0.26314		0.30364	0.09064		3.0344	2.62862		1.04351	0.289529		0.33793	0.09918		2.96077	2.60754		1.28252	0.646163		0.42886	0.22438		2.83934	2.65799
3.10339	0.250378		1.01775	0.12671		3.04853	1.97599		5.16704	0.257197		1.84316	0.13371		2.77759	1.92354		6.70818	0.257197		2.23261	0.13371		2.84014	1.92354
0.704973	0.905533		0.18925	0.39074		3.58565	2.53161		0.956049	1.63614		0.26295	0.59557		3.42941	2.27497		1.03145	1.75904		0.28487	0.64285		3.34286	2.24488
0.60017	3.08303		0.17611	0.76353		3.3223	4.00726		0.907041	6.62298		0.29821	1.75944		2.95818	3.75097		0.974145	9.05457		0.3198	2.54581		2.94708	3.54037
0.613742	0.940216		0.20602	0.32443		2.97172	2.73305		1.57356	1.78694		0.53333	0.62744		2.92217	2.68095		2.37504	2.17675		0.79267	0.74293		2.9487	2.78279
1.36395	0.994503		0.34956	0.32222		3.86741	2.76349		1.50344	1.50419		0.39004	0.52592		3.76952	2.4544		1.88194	1.9973		0.52686	0.7116		3.40885	2.38825
2.01916	1.61204		0.43221	0.45114		4.60717	3.48797		2.70303	2.09984		0.57601	0.62199		4.61937	3.24024		3.38387	2.98803		0.74116	0.89488		4.47612	3.20591
3.66888	0.897239		0.82589	0.33022		4.43412	2.65544		9.79348	1.85329		2.00711	0.69879		4.87601	2.59819		13.4827	2.54912		2.78645	0.95155		4.83623	2.57997
0.901009			0.29081			2.95827			2.96013			0.91364			3.16484			4.70183			1.53378			3.01489
Parameter			Parameter			Parameter			Parameter			Parameter			Parameter			Parameter			Parameter			Parameter
Table Analyzed	Data 1		Table Analyzed	Data 1		Table Analyzed	Data 1		Table Analyzed	Data 1		Table Analyzed	Data 1		Table Analyzed	Data 1		Table Analyzed	Data 1		Table Analyzed	Data 1		Table Analyzed	Data 1
Column A			Column A			Column A			Column A			Column A			Column A			Column A			Column A			Column A
vs	vs		vs	vs		vs	vs		vs	vs		vs	vs		vs	vs		vs	vs		vs	vs		vs	vs
Column B			Column B			Column B			Column B			Column B			Column B			Column B			Column B			Column B
Unpaired t test			Unpaired t test			Unpaired t test			Unpaired t test			Unpaired t test			Unpaired t test			Unpaired t test			Unpaired t test			Unpaired t test
P value	0.065		P value	0.0849		P value	0.0403		P value	0.0488		P value	0.0691		P value	0.0142		P value	0.0348		P value	0.0448		P value	0.0149
P value summary	ns		P value summary	ns		P value summary	*		P value summary	*		P value summary	ns		P value summary	*		P value summary	*		P value summary	*		P value summary	*
Are means signif. different? (P < 0.05)	No		Are means signif. different? (P < 0.05)	No		Are means signif. different? (P < 0.05)	Yes		Are means signif. different? (P < 0.05)	Yes		Are means signif. different? (P < 0.05)	No		Are means signif. different? (P < 0.05)	Yes		Are means signif. different? (P < 0.05)	Yes		Are means signif. different? (P < 0.05)	Yes		Are means signif. different? (P < 0.05)	Yes
One- or two-tailed P value?	Two-tailed		One- or two-tailed P value?	Two-tailed		One- or two-tailed P value?	Two-tailed		One- or two-tailed P value?	Two-tailed		One- or two-tailed P value?	Two-tailed		One- or two-tailed P value?	Two-tailed		One- or two-tailed P value?	Two-tailed		One- or two-tailed P value?	Two-tailed		One- or two-tailed P value?	Two-tailed
t, df	t=1.884 df=53		t, df	t=1.756 df=53		t, df	t=2.102 df=53		t, df	t=2.017 df=53		t, df	t=1.855 df=53		t, df	t=2.536 df=53		t, df	t=2.167 df=53		t, df	t=2.055 df=53		t, df	t=2.518 df=53
How big is the difference?			How big is the difference?			How big is the difference?			How big is the difference?			How big is the difference?			How big is the difference?			How big is the difference?			How big is the difference?			How big is the difference?
Mean ± SEM of column A	1.743 ?0.2740 N=28		Mean ± SEM of column A	0.4700 ?0.06201 N=28		Mean ± SEM of column A	3.433 ?0.1526 N=28		Mean ± SEM of column A	3.256 ?0.5579 N=28		Mean ± SEM of column A	0.8539 ?0.1232 N=28		Mean ± SEM of column A	3.432 ?0.1414 N=28		Mean ± SEM of column A	4.671 ?0.7972 N=28		Mean ± SEM of column A	1.217 ?0.1747 N=28		Mean ± SEM of column A	3.406 ?0.1418 N=28
Mean ± SEM of column B	1.100 ?0.2003 N=27		Mean ± SEM of column B	0.3272 ?0.05218 N=27		Mean ± SEM of column B	2.969 ?0.1590 N=27		Mean ± SEM of column B	1.884 ?0.3810 N=27		Mean ± SEM of column B	0.5572 ?0.1009 N=27		Mean ± SEM of column B	2.885 ?0.1636 N=27		Mean ± SEM of column B	2.551 ?0.5558 N=27		Mean ± SEM of column B	0.7478 ?0.1456 N=27		Mean ± SEM of column B	2.864 ?0.1625 N=27
Difference between means	0.6434 ?0.3414		Difference between means	0.1428 ?0.08133		Difference between means	0.4632 ?0.2203		Difference between means	1.372 ?0.6803		Difference between means	0.2967 ?0.1599		Difference between means	0.5471 ?0.2157		Difference between means	2.120 ?0.9784		Difference between means	0.4692 ?0.2283		Difference between means	0.5418 ?0.2152
95% confidence interval	-0.04195 to 1.329		95% confidence interval	-0.02045 to 0.3061		95% confidence interval	0.02093 to 0.9055		95% confidence interval	0.006248 to 2.738		95% confidence interval	-0.02434 to 0.6177		95% confidence interval	0.1140 to 0.9802		95% confidence interval	0.1559 to 4.084		95% confidence interval	0.01096 to 0.9274		95% confidence interval	0.1098 to 0.9739
R squared	0.0628		R squared	0.05498		R squared	0.07697		R squared	0.07126		R squared	0.06098		R squared	0.1082		R squared	0.08137		R squared	0.07382		R squared	0.1068
