# Supplementary material for: Non-canonical function of an Hif-1α splice variant contributes to the sustained flight of locusts
Source: eLife. 2022 Aug 30;11:e74554. doi: 10.7554/eLife.74554 (PMC9427102; doi:10.7554/eLife.74554)
Supplement: Supplementary file 1. [file elife-74554-supp1.docx]

Primers used in this study

| Primer name | Sequence, 5’-3’ | Description |
| --- | --- | --- |
| Hif-1α-F1 | AAGTATTTAGTGTATATAGC | Clone the full length of *Hif-α1* and *Hif-α2* |
| Hif-1α-F2 | AAGTATTTAGTGTATATAGC |
| Hif-1α1-R1 | CATTCAGGAAGTTCAGAATAA |
| Hif-1α1-R2 | CTAGTGCTTTAATGGGGTAA |
| Hif-1α2-R1 | ATACATTACACCTCTGTTAT |
| Hif-1α2-R2 | CTAAGAGGGCTTTGTCTGCT |
| Hif-1α1-T7-F | TAATACGACTCACTATAGGAAGAATTCCTTCTCACTTTTG | dsRNA synthesis |
| Hif-1α1-T7-R | TAATACGACTCACTATAGGCATTCAGGAAGTTCAGAATAA |
| Hif-1α2-T7-F | TAATACGACTCACTATAGGGTGAGTGCTGGTTACATTTGT |
| Hif-1α2-T7-R | TAATACGACTCACTATAGGATACATTACACCTCTGTTAT |
| PYK-T7-F | TAATACGACTCACTATAGGATTACAGTAAGAAATTGGGC |
| PYK-T7-R | TAATACGACTCACTATAGGGCTGCCGCATTCCGGATGAA |
| DJ-1-T7-F | TAATACGACTCACTATAGGTGTTAGCAGAAGGAGCAGAAGA |
| DJ-1-T7-R | TAATACGACTCACTATAGGAGGAAGCACCACTACATCGTAT |
| PHD-T7-F | TAATACGACTCACTATAGGGAATGGCAGTATTGTCGGAAGT |
| PHD-T7-R | TAATACGACTCACTATAGGAAATAGTGGTTCTATATCTG |
| Hif-1α-exF | TATCGCGGCCGCGCCATGGCCAGGAATTCGGAGAAACG | Over expression |
| Hif-1α1-exR | TATCTCTAGATTACTTATCGTCGTCATCCTTGTAATCCCCCATTAAAGCACTA |
| Hif-1α2-exR | TATCTCTAGATTACTTATCGTCGTCATCCTTGTAATCAGAGGGCTTTGTCTGCT |
| DJ-1-gF1 | TATCGAGCTCGAAAAACTCATTTACAGAAT |
| DJ-1-gF2 | TATCGAGCTCCAATTTCCGAACATTGATTT |
| DJ-1-gR | TATCCTCGAGATACATAATCGCGGAACTTTG |
| Hif-1α1-rtF | GGAACGAAAAGCAAGCATAC | qRT-PCR |
| Hif-1α1-rtR | ACTGATAAATTGTGGAATGTGC |
| Hif-1α2-rtF | CAGGCTCGACTCGTTCAGATG |
| Hif-1α2-rtR | GTGGAAGTGAAACCCAAAGGAA |
| DJ-1-rtF | TGCTGCTCCAACTGCTCTGAA |
| DJ-1-rtR | CCTGGTCCACGACTTGTGATGA |
| LDH-rtF | GTGAAGCACAGCCCAAATAC |
| LDH-rtR | GTGACATTAGGAACCGAAAA |
| ENO-rtF | ATGCCGCTCAAGAGCTGTCA |
| ENO-rtR | ACTCCTTTGCCCATGTAGTT |
| PYK-rtF | CAGGCATGAATGTAGCGAGGTT |
| PYK-rtR | CCCTTCAAGTAGCCCTGTTCT |
| GAPDH-rtF | TGCTGATGCTCCAATGTATGTT |
| GAPDH-rtR | ATGGTCCGTCCACAGTCTTC |
| GBE1-rtF | GGCAATGGCAATACCTGACA |
| GBE1-rtR | CTGATCGTGAGATTCCGCATAT |
| MIOX-rtF | TCCGCTTCCACTCGTTCTAC |
| MIOX-rtR | CCAGGCAGGTACTTGTCTATGA |
| PGI-rtF | ACCGAAGCAATACTCCAATTCT |
| PGI-rtR | CAAGTCTGAACCACCAATTCCT |
| PGM-rtF | CAAGCAGTCTGGTGTGAAGG |
| PGM-rtR | CGGATATGGTCTGAGCCTGT |
| PFK-rtF | GCTTGCAGGACAGCGATTA |
| PFK-rtR | ACCCATACGACATCCCAAT |
| PDHX-rtF | GTCATACGATAACCGAGCCA |
| PDHX-rtR | CACTACCGAGCAGCAGTAAAT |
| PHD-rtF | CTGAATCGTGACTGGAATGTGA |
| PHD-rtR | TCTTGTATGCTGGCTGAACTTC |
| PDK-rtF | CTCCCGATTTCTCGTCTGTATG |
| PDK-rtR | CGGATGTTTGAACTGTTGCTCC |
| RP49-rtF | CGTAAACCGAAGGGAATTGA |
| RP49-rtR | GAAGAAACTGCATGGGCAAT |
| BNIP3-rtF | GACCGACGACGACCTCAA |
| BNIP3-rtR | GCTCCAGTCCCAAATCCA |
| GAPDH-gF | TCAGCATTCCTTCCCTTATC | Mitochondrial DNA copy number |
| GAPDH-gR | CAGAGCATTGCGAACTACAT |
| CYTB-gF | ATTTCACCTCAGCAACAATA |
| CYTB-gR | ACAAGACCAGTTAAACCTCC |
| Hif-1α1-F | AAGAATTCCTTCTCACTTTTGGAGC | 3’- RACE |
| Hif-1α2-F | GTGAGTGCTGGTTACATTTGTTTAG |
